# Supplementary material for: Cyanomethylation of alkenes with C–H bond activation of acetonitrile: in situ generated diazonium salts as promoters without transition-metals
Source: Royal Society of Chemistry journal article supplement (doi:10.1039/c5ra23471a), 2015-12-17

## Supporting information

### **Cyanomethylation of Alkenes with C-H Bond Activation of Acetonitrile: In-situ Generated Diazonium Salts as Promoter without Transition-metals**

Zhangqin Ni, Xin Huang, Jichao Wang, Yuanjiang Pan\*

*Department of Chemistry, Zhejiang University, Hangzhou, 310027, China*

### **Table of Contents**

|                                                                             |           |
|-----------------------------------------------------------------------------|-----------|
| <b>1. Experimental Section.....</b>                                         | <b>1</b>  |
| <b>1.1 General information .....</b>                                        | <b>1</b>  |
| <b>1.2 General procedure for the preparation of N-arylacrylamides .....</b> | <b>1</b>  |
| <b>2. Experimental Procedures and Spectral Data .....</b>                   | <b>2</b>  |
| <b>2.1 General procedure for the synthesis of oxoindoles .....</b>          | <b>2</b>  |
| <b>2.2 substrate scope of N-Arylacrylamides .....</b>                       | <b>2</b>  |
| <b>3. Control Experiments. ....</b>                                         | <b>7</b>  |
| <b>4. NMR Spectra .....</b>                                                 | <b>10</b> |

# 1. Experimental Section

## 1.1 General information

All reagents were purchased from commercial suppliers and used without further purification. All reactions were conducted in oven-dried schlenk tubes under nitrogen atmosphere.  $^1\text{H-NMR}$  and  $^{13}\text{C-NMR}$  spectra were recorded on a Bruker Avance 400 spectrometer at ambient temperature in  $\text{CDCl}_3$ . Data for  $^1\text{H-NMR}$  are reported as follows: chemical shift ( $\delta$  ppm), multiplicity, coupling constant (Hz), and integration. Data for  $^{13}\text{C-NMR}$  are reported in terms of chemical shift ( $\delta$  ppm). Gas chromatography coupled to electron impact ionization/ time-of-flight mass spectrometry (GC/EI-TOF-MS) was performed using a HP6890 gas chromatography with a time of flight mass spectrometry (GCT premier GC-TOFMA, America). Flash column chromatographic purification of products was accomplished using forced-flow chromatography on Silica Gel (200-300 mesh).

## 1.2 General procedure for the preparation of N-arylacrylamides

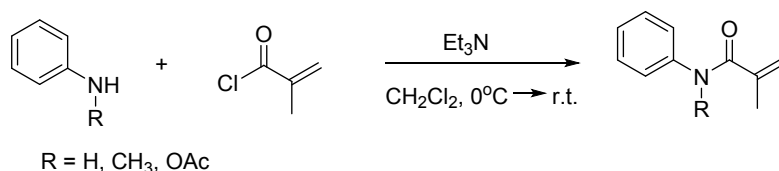

In a dry 100 mL round-bottom flask, a mixture of aniline (10 mmol) and  $\text{Et}_3\text{N}$  (30 mmol, 3equiv) in 30 mL of  $\text{CH}_2\text{Cl}_2$  were stirred in the ice-water bath. The methacryloyl chloride (15 mmol, 1.5 equiv) was added slowly by a syringe. The reaction was monitored by TLC. After the reaction completed, the mixture was evaporated under reduced pressure and extracted by ethyl acetate. The product was purified by silica gel column chromatography.

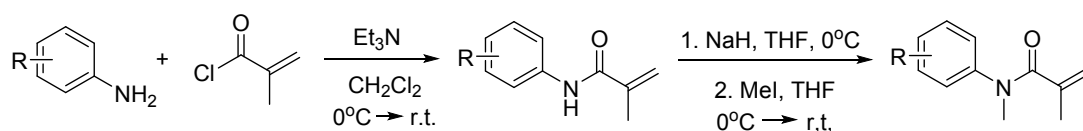

In a dry 100 mL round-bottom flask, a mixture of aniline (10 mmol) and  $\text{Et}_3\text{N}$  (30 mmol, 3equiv) in 30 mL of  $\text{CH}_2\text{Cl}_2$  were stirred in the ice-water bath. The methacryloyl chloride (15 mmol, 1.5 equiv) was added slowly by a syringe. The reaction was monitored by TLC. After the reaction completed, the mixture was evaporated under reduced pressure and extracted by ethyl acetate. The crude product was purified by silica gel column chromatography.

In a dry 50 mL round-bottom flask, N-phenylmethacrylamide (5 mmol) was dissolved in 15 mL THF and stirred in the ice-water bath. The  $\text{NaH}$  (7.5 mmol, 1.5 equiv) was added slowly. After 5 mins, the  $\text{MeI}$  (7.5 mmol, 1.5equiv) was added to the mixture slowly by a syringe. The reaction was monitored by TLC. When the reaction completed, the mixture was evaporated under reduced pressure and extracted by ethyl acetate. The product was purified by silica gel column chromatography.

## 2. Experimental Procedures and Spectral Data

### 2.1 General procedure for the synthesis of oxoindoles

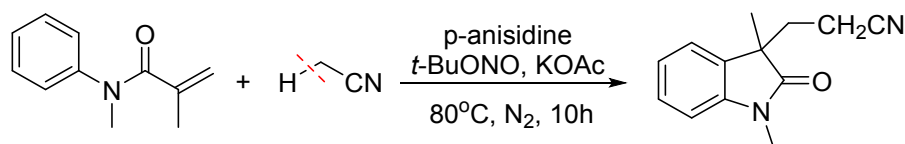

In a dry 25 mL oven-dried schlenk tubes, N-arylacrylamide (0.5 mmol), aniline (1.5 mmol, 3.0 equiv) and KOAc (1.0 mmol, 2.0 equiv) were dissolved in 4 mL CH<sub>3</sub>CN under an atmosphere of dry nitrogen at room temperature. *Tert*-butyl nitrite (1.5 mmol, 3.0 equiv) was then added with a syringe. A fine bubbling was observed and the reaction mixture was heated to 80°C for 10h. Then the solution was cooled to r.t., washed with a saturated aqueous solution of NaCl, extracted by ethyl acetate and dried over by Na<sub>2</sub>SO<sub>4</sub>. The product was purified by silica gel column chromatography.

### 2.2 substrate scope of N-Arylacrylamides

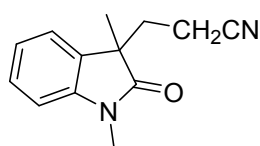

#### 3-(1,3-dimethyl-2-oxoindolin-3-yl)propanenitrile

<sup>1</sup>H NMR (CDCl<sub>3</sub>, 400 MHz)  $\delta$ : 7.31 (m, 1H), 7.18 (m, 1H), 7.10 (m, 1H), 6.87 (d, J = 7.6Hz, 1H), 3.22 (s, 3H), 2.32 (m, 1H), 2.05 (m, 3H), 1.39 (s, 3H).

<sup>13</sup>C NMR (CDCl<sub>3</sub>, 100 MHz)  $\delta$ : 179.1, 143.3, 131.8, 128.9, 123.2, 122.8, 119.0, 108.7, 47.5, 33.6, 26.5, 23.6, 13.0.

HRMS (EI, *m/z*): calcd for C<sub>13</sub>H<sub>14</sub>N<sub>2</sub>O: 214.1106; found: 214.1100.

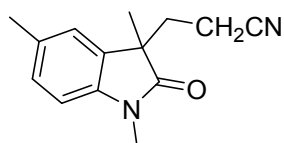

#### 3-(1,3,5-trimethyl-2-oxoindolin-3-yl)propanenitrile

<sup>1</sup>H NMR (CDCl<sub>3</sub>, 400 MHz)  $\delta$ : 7.10 (m, 1H), 7.09 (s, 1H), 6.75 (d, J = 6.3Hz, 1H), 3.18 (s, 3H), 2.35 (s, 3H), 2.30 (m, 1H), 2.03 (m, 3H), 1.37 (s, 3H).

<sup>13</sup>C NMR (CDCl<sub>3</sub>, 100 MHz)  $\delta$ : 178.7, 140.6, 132.5, 131.5, 128.7, 123.3, 118.8, 108.1, 47.2, 33.3, 26.2, 23.3, 21.0, 12.7.

HRMS (EI, *m/z*): calcd for C<sub>14</sub>H<sub>16</sub>N<sub>2</sub>O: 228.1263; found: 228.1268.

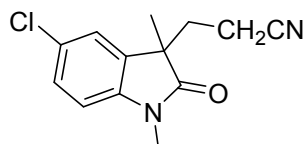

**3-(5-chloro-1,3-dimethyl-2-oxoindolin-3-yl)propanenitrile**

<sup>1</sup>H NMR (CDCl<sub>3</sub>, 400 MHz) δ: 7.22 (m, 1H), 7.1 (m, 1H), 6.74 (d, J = 6.6Hz, 1H), 3.13 (s, 3H), 2.25 (m, 1H), 1.98 (m, 3H), 1.32 (s, 3H).

<sup>13</sup>C NMR (CDCl<sub>3</sub>, 100 MHz) δ: 178.2, 141.6, 133.3, 128.5, 128.2, 123.1, 118.4, 109.4, 47.4, 33.0, 26.3, 23.2, 12.6.

HRMS (EI, *m/z*): calcd for C<sub>13</sub>H<sub>13</sub>ClN<sub>2</sub>O: 248.0716; found: 248.0711.

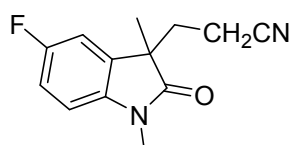

**3-(5-fluoro-1,3-dimethyl-2-oxoindolin-3-yl)propanenitrile**

<sup>1</sup>H NMR (CDCl<sub>3</sub>, 400 MHz) δ: 7.01 (m, 1H), 6.94 (m, 1H), 6.80 (m, 1H), 3.19 (s, 3H), 2.29 (m, 1H), 2.02 (m, 3H), 1.38 (s, 3H).

<sup>13</sup>C NMR (CDCl<sub>3</sub>, 100 MHz) δ: 178.4, 160.5, 158.1, 138.9, 138.9, 133.3, 133.2, 118.4, 114.9, 114.7, 110.9, 110.7, 109.0, 109.0, 47.6, 47.6, 33.1, 26.3, 23.2, 12.6.

HRMS (EI, *m/z*): calcd for C<sub>13</sub>H<sub>13</sub>FN<sub>2</sub>O: 232.1012; found: 232.1010.

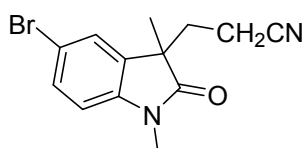

**3-(5-bromo-1,3-dimethyl-2-oxoindolin-3-yl)propanenitrile**

<sup>1</sup>H NMR (CDCl<sub>3</sub>, 400 MHz) δ: 7.44 (m, 1H), 7.30 (m, 1H), 6.76 (d, J = 8.3Hz, 1H), 3.20 (s, 3H), 2.33 (m, 1H), 2.06 (m, 3H), 1.40 (s, 3H).

<sup>13</sup>C NMR (CDCl<sub>3</sub>, 100 MHz) δ: 178.2, 142.1, 133.7, 131.5, 125.9, 118.4, 115.7, 109.9, 47.4, 33.2, 26.4, 23.4, 12.8.

HRMS (EI, *m/z*): calcd for C<sub>13</sub>H<sub>13</sub>BrN<sub>2</sub>O: 292.0211; found: 292.0207.

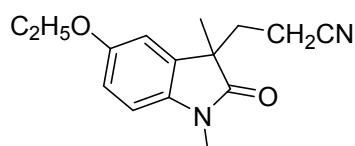

**3-(5-ethoxy-1,3-dimethyl-2-oxoindolin-3-yl)propanenitrile**

<sup>1</sup>H NMR (CDCl<sub>3</sub>, 400 MHz) δ: 6.79 (m, 3H), 3.99 (q, J = 5.6Hz, 2H), 3.17 (s, 3H), 2.29 (m, 1H), 2.01 (m, 3H), 1.39 (t, J = 5.6Hz, 3H), 1.36 (s, 3H).

<sup>13</sup>C NMR (CDCl<sub>3</sub>, 100 MHz) δ: 178.4, 155.6, 136.3, 132.8, 118.7, 113.1, 110.7, 108.7, 64.0, 47.6, 33.3, 26.2, 23.4, 14.7, 12.7.

HRMS (EI, *m/z*): calcd for C<sub>15</sub>H<sub>18</sub>N<sub>2</sub>O<sub>2</sub>: 258.1368; found: 258.1364.

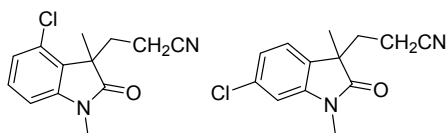

**3-(4-chloro-1,3-dimethyl-2-oxoindolin-3-yl)propanenitrile 3-(6-chloro-1,3-dimethyl-2-oxoindolin-3-yl)propanenitrile**

**<sup>1</sup>H NMR** (CDCl<sub>3</sub>, 400 MHz)  $\delta$ : 7.26 (m, 1.3H), 7.10 (m, 1H), 7.04 (m, 1.1H), 6.89 (m, 0.4H), 6.81 (m, 1.1H), 3.23 (s, 3H), 3.21 (s, 1.1H), 2.53 (m, 1.2H), 2.38 (m, 1.7H), 2.03 (m, 3.7H), 1.53 (s, 3H), 1.39 (s, 1.3H).

**<sup>13</sup>C NMR** (CDCl<sub>3</sub>, 100 MHz)  $\delta$ : 178.7, 178.2, 144.9, 144.2, 134.3, 130.6, 129.9, 129.9, 127.2, 123.7, 123.5, 122.7, 118.5, 118.3, 109.2, 107.0, 48.9, 46.9, 33.0, 30.2, 26.5, 26.3, 23.3, 21.1, 13.0, 12.7.

**HRMS** (EI, *m/z*): calcd for C<sub>13</sub>H<sub>13</sub>ClN<sub>2</sub>O: 248.0716; found: 248.0720.

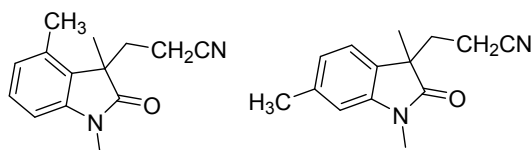

**3-(1,3,4-trimethyl-2-oxoindolin-3-yl)propanenitrile 3-(1,3,6-trimethyl-2-oxoindolin-3-yl)propanenitrile**

**<sup>1</sup>H NMR** (CDCl<sub>3</sub>, 400 MHz)  $\delta$ : 7.19 (t, *J* = 6.3Hz, 1H), 7.04 (d, *J* = 6Hz, 0.6H), 6.89 (d, *J* = 6Hz, 0.7H), 6.84 (d, *J* = 6.2Hz, 1H), 6.70 (m, 1.5H), 3.17 (m, 4.4H), 2.36 (m, 5.3H), 2.26 (m, 1.9H), 2.00 (m, 4.7H), 1.45 (s, 3H), 1.35 (s, 1.8H).

**<sup>13</sup>C NMR** (CDCl<sub>3</sub>, 100 MHz)  $\delta$ : 179.0, 178.7, 143.3, 143.0, 138.6, 134.2, 128.4, 128.3, 127.9, 125.3, 123.3, 122.1, 118.7, 118.5, 109.3, 106.1, 48.7, 46.9, 33.2, 31.2, 26.2, 26.0, 23.3, 21.6, 21.6, 18.0, 12.8, 12.6.

**HRMS** (EI, *m/z*): calcd for C<sub>14</sub>H<sub>16</sub>N<sub>2</sub>O: 228.1263; found: 228.1260.

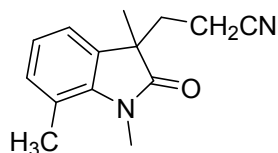

**3-(1,3,7-trimethyl-2-oxoindolin-3-yl)propanenitrile**

**<sup>1</sup>H NMR** (CDCl<sub>3</sub>, 400 MHz)  $\delta$ : 6.99 (m, 3H), 3.49 (s, 3H), 2.57 (s, 3H), 2.30 (m, 1H), 2.00 (m, 3H), 1.36 (s, 3H).

**<sup>13</sup>C NMR** (CDCl<sub>3</sub>, 100 MHz)  $\delta$ : 179.5, 140.7, 132.2, 132.1, 122.8, 120.3, 120.1, 118.8, 46.5, 33.5, 29.5, 23.7, 18.9, 12.7.

**HRMS** (EI, *m/z*): calcd for C<sub>14</sub>H<sub>16</sub>N<sub>2</sub>O: 228.1263; found: 228.1259.

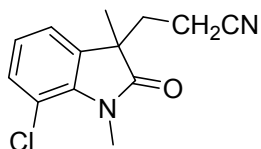

**3-(7-chloro-1,3-dimethyl-2-oxoindolin-3-yl)propanenitrile**

<sup>1</sup>H NMR (CDCl<sub>3</sub>, 400 MHz)  $\delta$ : 7.25 (m, 1H), 7.07 (m, 1H), 7.01 (m, 1H), 3.59 (s, 3H), 2.33 (m, 1H), 2.06 (m, 3H), 1.40 (s, 3H).

<sup>13</sup>C NMR (CDCl<sub>3</sub>, 100 MHz)  $\delta$ : 179.0, 139.0, 134.5, 131.0, 123.8, 121.1, 118.5, 116.0, 47.1, 33.5, 29.6, 23.8, 12.8.

HRMS (EI, *m/z*): calcd for C<sub>13</sub>H<sub>13</sub>ClN<sub>2</sub>O: 248.0716; found: 248.0722.

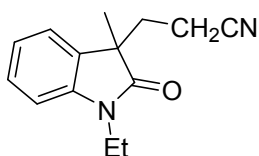

**3-(1-ethyl-3-methyl-2-oxoindolin-3-yl)propanenitrile**

<sup>1</sup>H NMR (CDCl<sub>3</sub>, 400 MHz)  $\delta$ : 7.29 (m, 1H), 7.17 (m, 1H), 7.09 (m, 1H), 6.89 (d, *J* = 6.2Hz, 1H), 3.75 (m, 2H), 2.30 (m, 1H), 2.05 (m, 3H), 1.37 (s, 3H), 1.25 (t, *J* = 5.8Hz, 3H).

<sup>13</sup>C NMR (CDCl<sub>3</sub>, 100 MHz)  $\delta$ : 178.3, 142.0, 131.7, 128.5, 122.7, 122.6, 118.7, 108.5, 47.1, 34.6, 33.3, 23.3, 12.6, 12.5.

HRMS (EI, *m/z*): calcd for C<sub>14</sub>H<sub>16</sub>N<sub>2</sub>O: 228.1263; found: 228.1269.

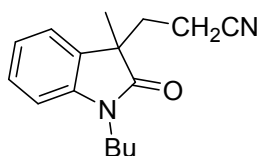

**3-(1-butyl-3-methyl-2-oxoindolin-3-yl)propanenitrile**

<sup>1</sup>H NMR (CDCl<sub>3</sub>, 400 MHz)  $\delta$ : 7.30 (m, 1H), 7.18 (m, 1H), 7.08 (m, 1H), 6.88 (d, *J* = 6.2Hz, 1H), 3.7 (t, *J* = 6.0Hz, 2H), 2.31 (m, 1H), 2.08 (m, 3H), 1.64 (t, *J* = 6.9Hz, 2H), 1.37 (m, 4H), 0.96 (t, *J* = 5.9Hz, 3H).

<sup>13</sup>C NMR (CDCl<sub>3</sub>, 100 MHz)  $\delta$ : 178.7, 142.5, 131.8, 128.6, 122.8, 122.7, 118.9, 108.8, 47.2, 39.8, 33.4, 29.5, 23.6, 20.1, 13.7, 12.8.

HRMS (EI, *m/z*): calcd for C<sub>16</sub>H<sub>20</sub>N<sub>2</sub>O: 256.1576; found: 256.1570.

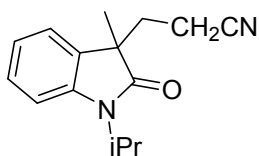

**3-(1-isopropyl-3-methyl-2-oxoindolin-3-yl)propanenitrile**

<sup>1</sup>H NMR (CDCl<sub>3</sub>, 400 MHz)  $\delta$ : 7.27 (m, 1H), 7.18 (m, 1H), 7.09 (m, 1H), 7.05 (m, 1H), 4.62 (m, 1H), 2.33 (m, 1H), 2.30 (m, 3H), 1.47 (m, 6H), 1.37 (s, 3H).

<sup>13</sup>C NMR (CDCl<sub>3</sub>, 100 MHz)  $\delta$ : 178.4, 141.7, 132.0, 128.3, 122.8, 122.4, 118.8, 110.1, 46.9, 43.8, 33.5, 23.6, 19.4, 19.3, 12.6.

HRMS (EI, *m/z*): calcd for C<sub>15</sub>H<sub>18</sub>N<sub>2</sub>O: 242.1419; found: 242.1415.

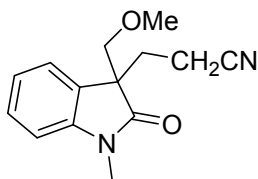

**3-(3-(methoxymethyl)-1-methyl-2-oxoindolin-3-yl)propanenitrile**

**<sup>1</sup>H NMR** (CDCl<sub>3</sub>, 400 MHz)  $\delta$ : 7.24 (m, 2H), 7.04 (t, J = 6.0Hz, 1H), 6.80 (d, J = 6.2Hz, 1H), 3.59 (d, J = 7.1Hz, 1H), 3.42 (d, J = 7.1Hz, 1H), 3.19 (s, 3H), 3.14 (s, 3H), 2.26 (m, 1H), 2.02 (m, 3H).

**<sup>13</sup>C NMR** (CDCl<sub>3</sub>, 100 MHz)  $\delta$ : 176.4, 143.7, 128.9, 128.8, 123.7, 122.9, 118.7, 108.3, 75.7, 59.4, 52.4, 28.9, 26.2, 12.3.

**HRMS** (EI, *m/z*): calcd for C<sub>14</sub>H<sub>16</sub>N<sub>2</sub>O<sub>2</sub>: 244.1212; found: 244.1211.

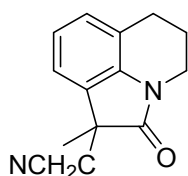

**2-(1-methyl-2-oxo-1,2,5,6-tetrahydro-4H-pyrrolo[3,2,1-*ij*]quinolin-1-yl)acetonitrile**

**<sup>1</sup>H NMR** (CDCl<sub>3</sub>, 400 MHz)  $\delta$ : 7.02 (m, 3H), 3.72 (m, 2H), 2.79 (t, J = 6.0Hz, 2H), 2.28 (m, 1H), 2.06 (m, 5H), 1.40 (s, 3H).

**<sup>13</sup>C NMR** (CDCl<sub>3</sub>, 100 MHz)  $\delta$ : 177.6, 138.8, 130.0, 127.3, 122.3, 120.5, 120.3, 118.8, 48.5, 38.7, 33.1, 24.4, 23.1, 21.0, 12.8.

**HRMS** (EI, *m/z*): calcd for C<sub>14</sub>H<sub>14</sub>N<sub>2</sub>O: 226.1106; found: 226.1100.

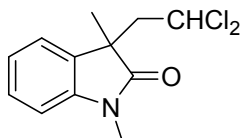

**3-(2,2-dichloroethyl)-1,3-dimethylindolin-2-one**

**<sup>1</sup>H NMR** (CDCl<sub>3</sub>, 400 MHz)  $\delta$ : 7.46 (m, 1H), 7.32 (m, 1H), 7.09 (m, 1H), 7.03 (m, 1H), 5.58 (q, J = 5.2 Hz, 1H), 3.11 (s, 3H), 2.94 (m, 1H), 2.78 (m, 1H), 1.27 (s, 3H).

**<sup>13</sup>C NMR** (CDCl<sub>3</sub>, 100 MHz)  $\delta$ : 178.9, 143.6, 131.0, 128.8, 123.9, 122.7, 109.1, 71.5, 49.4, 47.1, 26.7, 26.7.

**HRMS** (EI, *m/z*): calcd for C<sub>12</sub>H<sub>13</sub>Cl<sub>2</sub>NO: 257.0374; found: 257.0370.

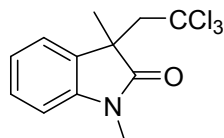

1,3-dimethyl-3-(2,2,2-trichloroethyl)indolin-2-one

$^1\text{H NMR}$  ( $\text{CDCl}_3$ , 400 MHz)  $\delta$ : 7.54 (m, 1H), 7.28 (m, 1H), 7.03 (m, 2H), 3.71 (m, 1H), 3.43 (m, 1H), 3.14 (s, 3H), 1.29 (s, 3H).

$^{13}\text{C NMR}$  ( $\text{CDCl}_3$ , 100 MHz)  $\delta$ : 178.4, 143.5, 129.8, 128.8, 125.3, 122.0, 109.1, 97.3, 59.1, 47.9, 26.8, 26.7.

HRMS (EI,  $m/z$ ): calcd for  $\text{C}_{12}\text{H}_{12}\text{Cl}_3\text{NO}$ : 290.9984; found: 290.9988.

### 3. Control Experiments.

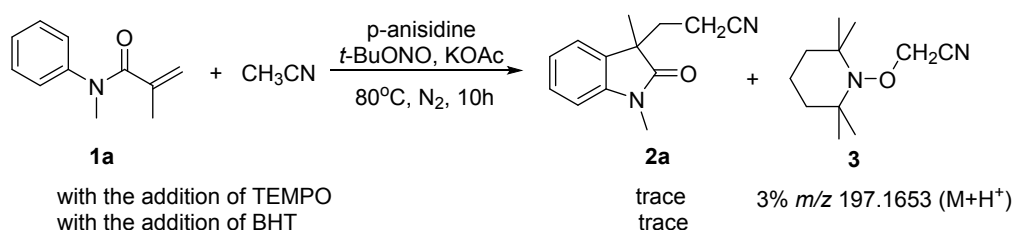

In a dry 25 mL oven-dried schlenk tubes, N-arylacrylamide (0.5 mmol), aniline (1.5 mmol, 3.0 equiv), KOAc (1.0 mmol, 2.0 equiv) and TEMPO (or BHT) (1.5 mmol, 3.0 equiv) were dissolved in 4 mL  $\text{CH}_3\text{CN}$  under an atmosphere of dry nitrogen at room temperature. *Tert*-butyl nitrite (1.5 mmol, 3.0 equiv) was then added with a syringe. The reaction mixture was heated to  $80^\circ\text{C}$  for 10h. Then the solution was cooled to r.t., washed with a saturated aqueous solution of NaCl, extracted by ethyl acetate and dried over by  $\text{Na}_2\text{SO}_4$ . The mixture was detected by GC-MS and the exact molecular weight of compound **3** was confirmed by HRMS.

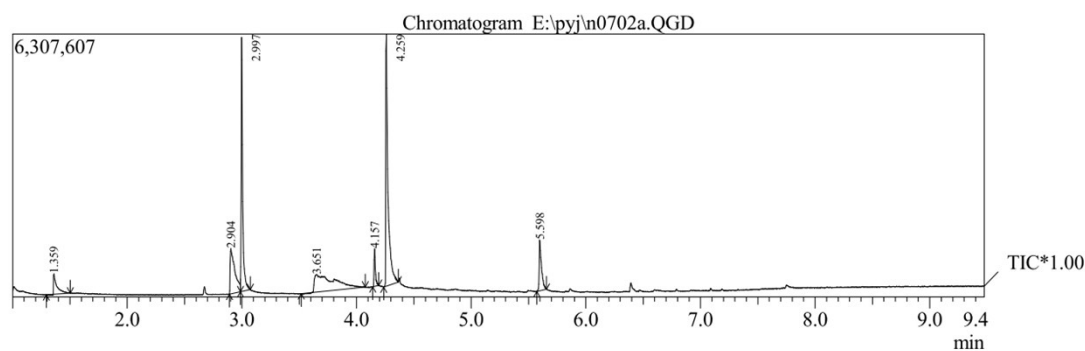

| Peak Report TIC |        |        |        |          |        |          |         |       |      |      |
|-----------------|--------|--------|--------|----------|--------|----------|---------|-------|------|------|
| Peak#           | R.Time | I.Time | F.Time | Area     | Area%  | Height   | Height% | A/H   | Mark | Nar  |
| 1               | 1.359  | 1.293  | 1.503  | 1004466  | 4.05   | 486943   | 2.99    | 2.06  | MI   | Pip  |
| 2               | 2.904  | 2.890  | 2.987  | 3082117  | 12.42  | 1087250  | 6.69    | 2.83  |      | eryl |
| 3               | 2.997  | 2.987  | 3.073  | 5371754  | 21.64  | 6095996  | 37.49   | 0.88  | V    | Pip  |
| 4               | 3.651  | 3.517  | 4.077  | 4975195  | 20.04  | 423312   | 2.60    | 11.75 | MI   | Ber  |
| 5               | 4.157  | 4.140  | 4.193  | 723656   | 2.92   | 902964   | 5.55    | 0.80  |      | 2-N  |
| 6               | 4.259  | 4.237  | 4.363  | 7996578  | 32.22  | 6045226  | 37.18   | 1.32  |      | Cro  |
| 7               | 5.598  | 5.573  | 5.657  | 1666647  | 6.71   | 1219693  | 7.50    | 1.37  |      | Tet  |
|                 |        |        |        | 24820413 | 100.00 | 16261384 | 100.00  |       |      |      |



<< Target >>

Line#:3 R.Time:2.997(Scan#:600) MassPeaks:90  
RawMode:Averaged 2.993-3.000(599-601) BasePeak:69.10(591919)  
BG Mode:Calc. from Peak Group 1 - Event 1

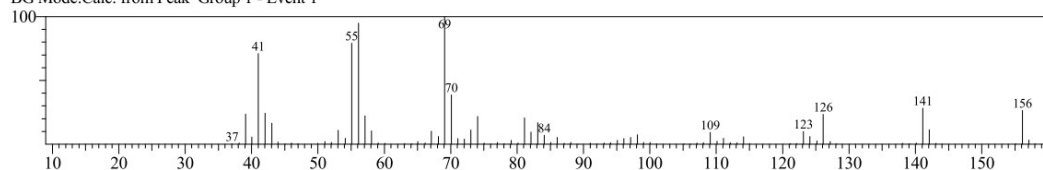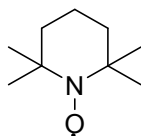

Chemical Formula: C<sub>9</sub>H<sub>18</sub>NO<sup>+</sup>  
Exact Mass: 156.14

<< Target >>

Line#:4 R.Time:3.650(Scan#:796) MassPeaks:73  
RawMode:Averaged 3.647-3.653(795-797) BasePeak:108.05(114539)  
BG Mode:Calc. from Peak Group 1 - Event 1

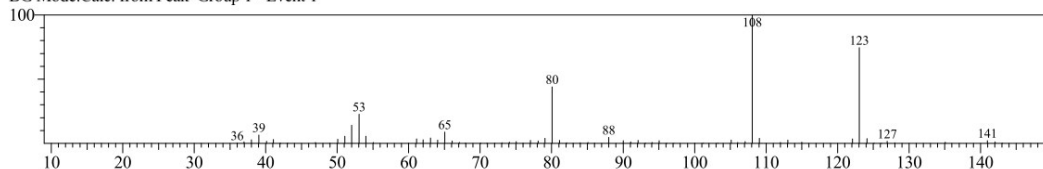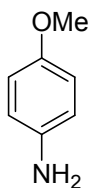

Chemical Formula: C<sub>7</sub>H<sub>9</sub>NO  
Exact Mass: 123.07

<< Target >>

Line#:5 R.Time:4.157(Scan#:948) MassPeaks:99  
RawMode:Averaged 4.153-4.160(947-949) BasePeak:69.10(67542)  
BG Mode:Calc. from Peak Group 1 - Event 1

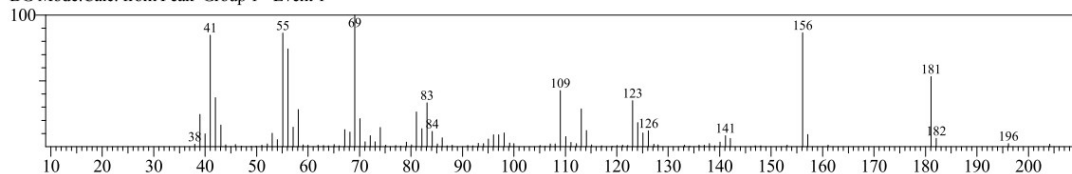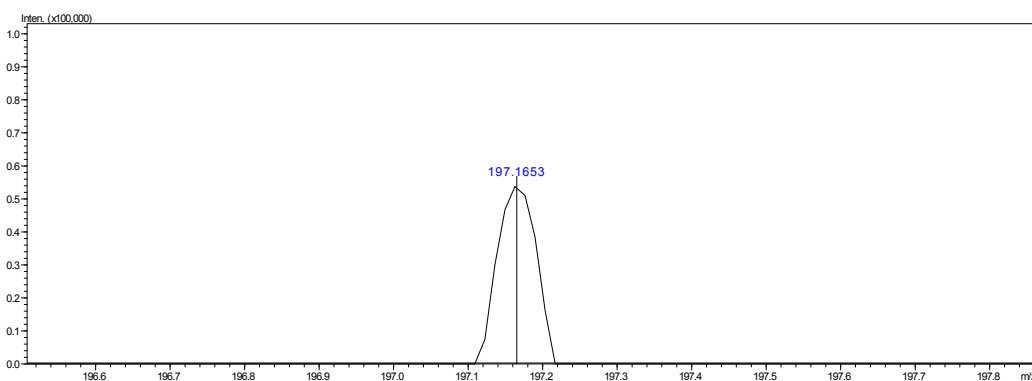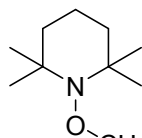

HRMS (ESI, *m/z*): calcd for C<sub>11</sub>H<sub>21</sub>N<sub>2</sub>O<sup>+</sup>: 197.1648; found: 197.1653.

<< Target >>

Line#6 R.Time:4.260(Scan#:979) MassPeaks:122

RawMode:Averaged 4.257-4.263(978-980) BasePeak:69.05(972640)

BG Mode:Calc. from Peak Group 1 - Event 1

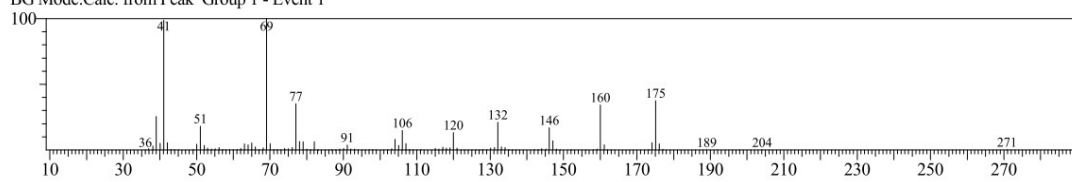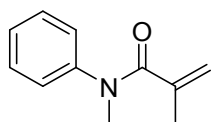

Chemical Formula: C<sub>11</sub>H<sub>13</sub>NO

Exact Mass: 175.10

## 4. NMR Spectra

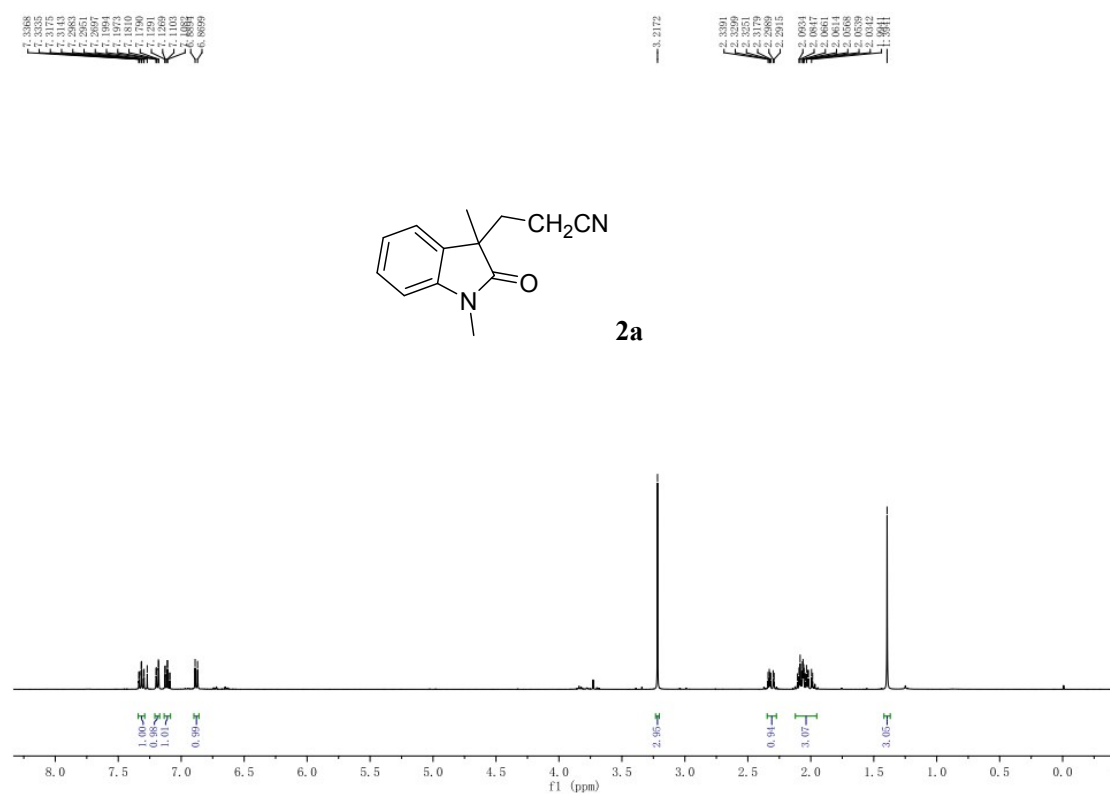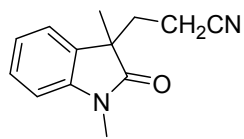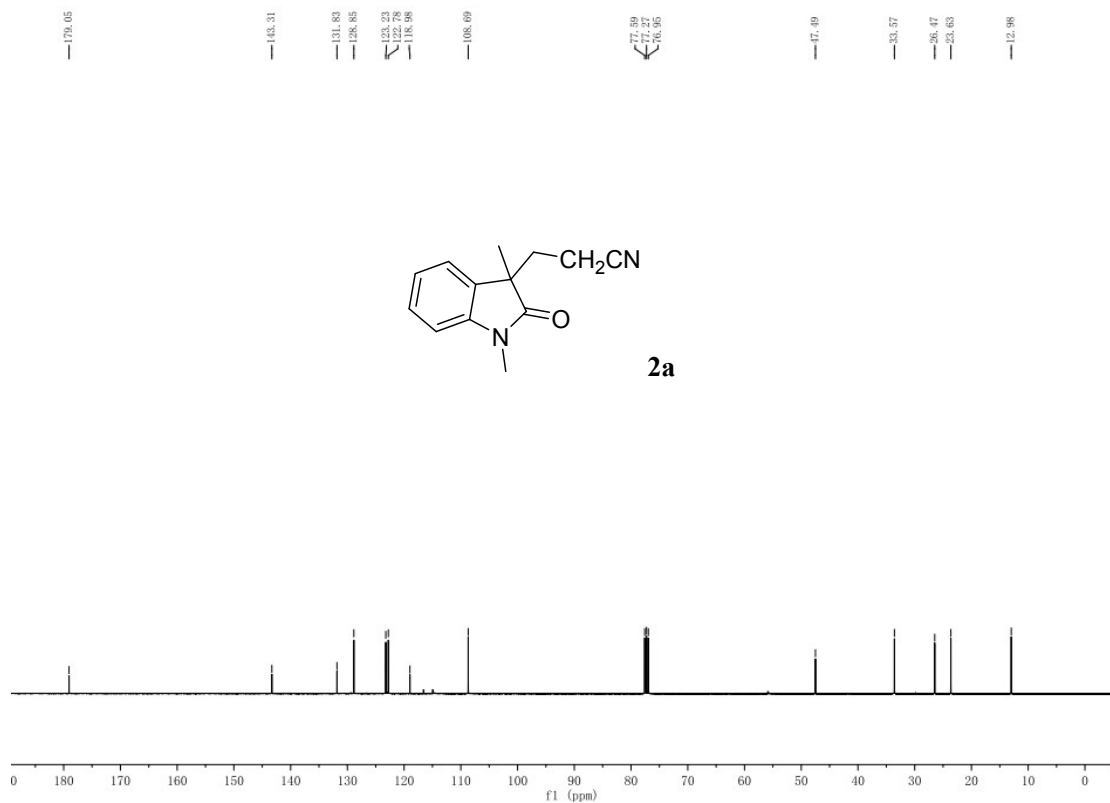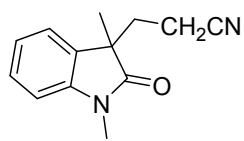

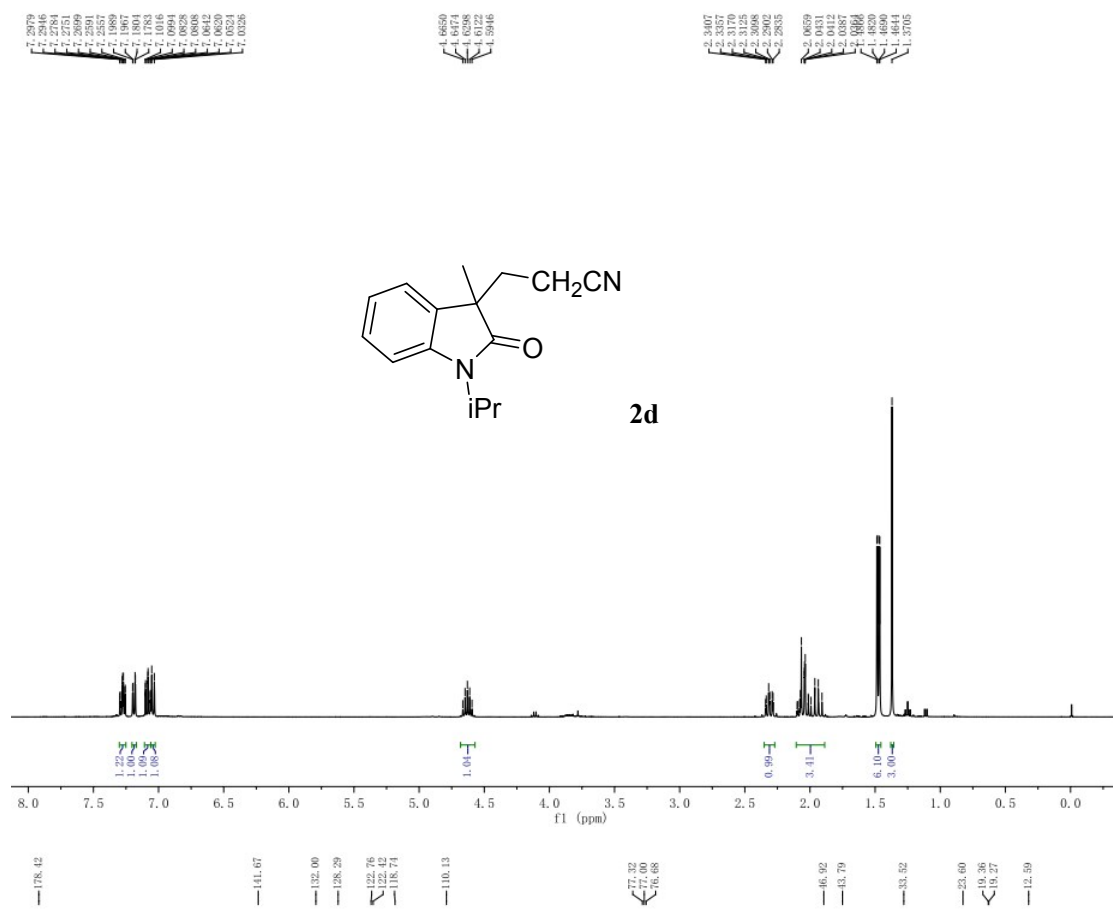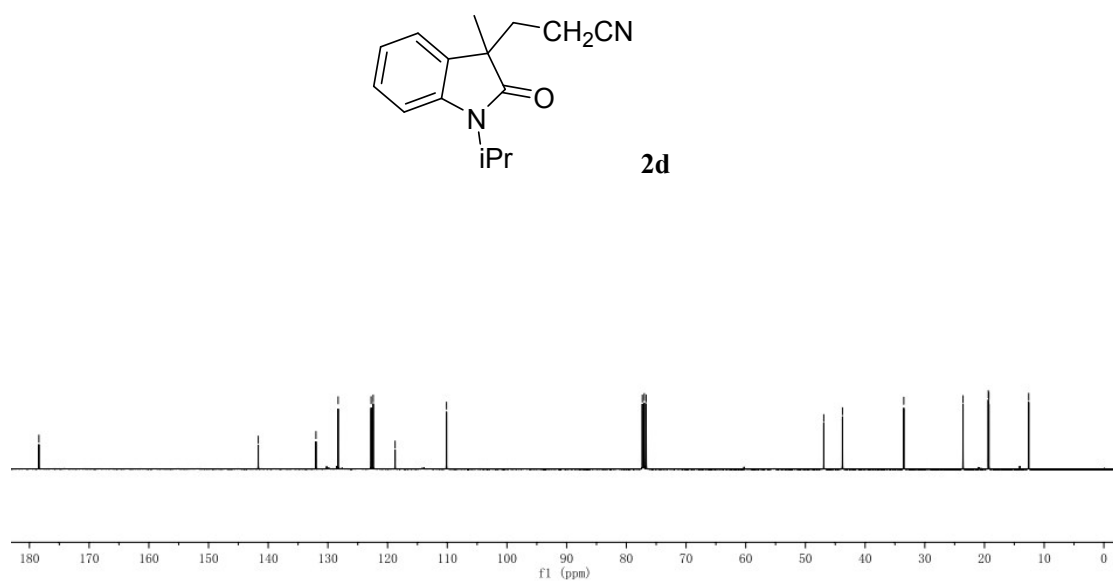

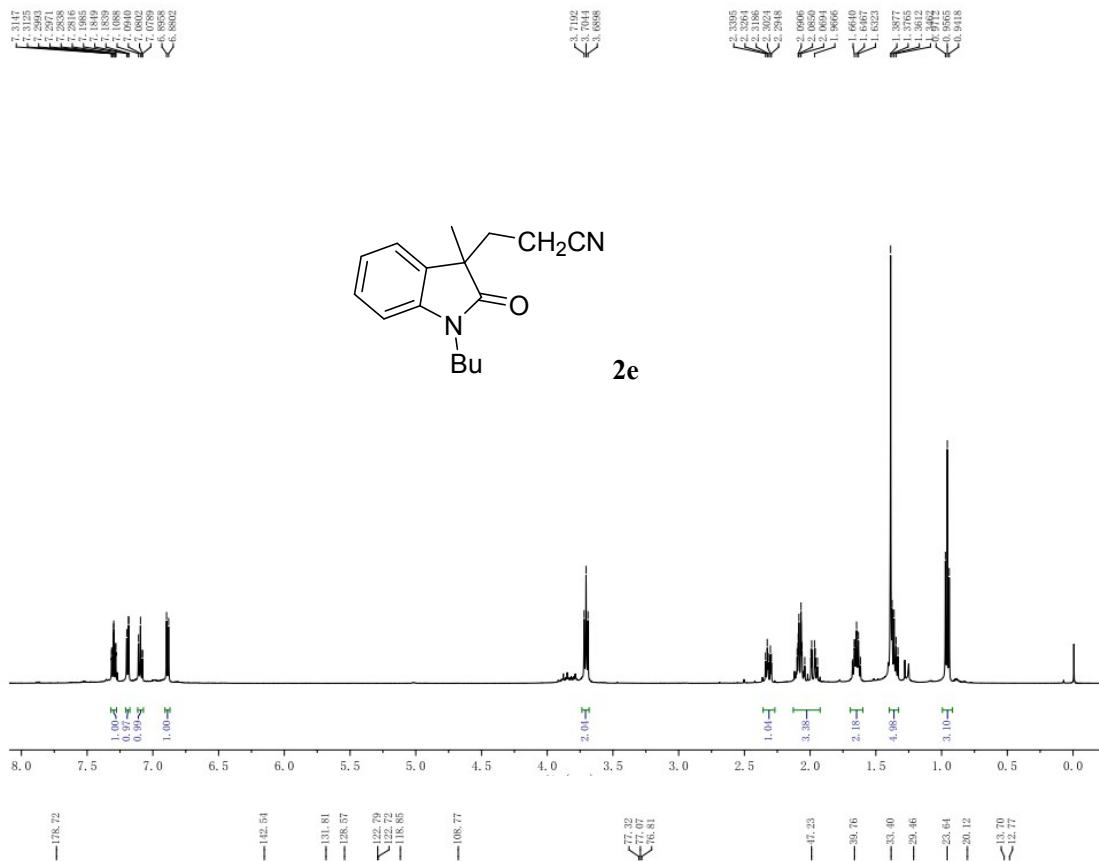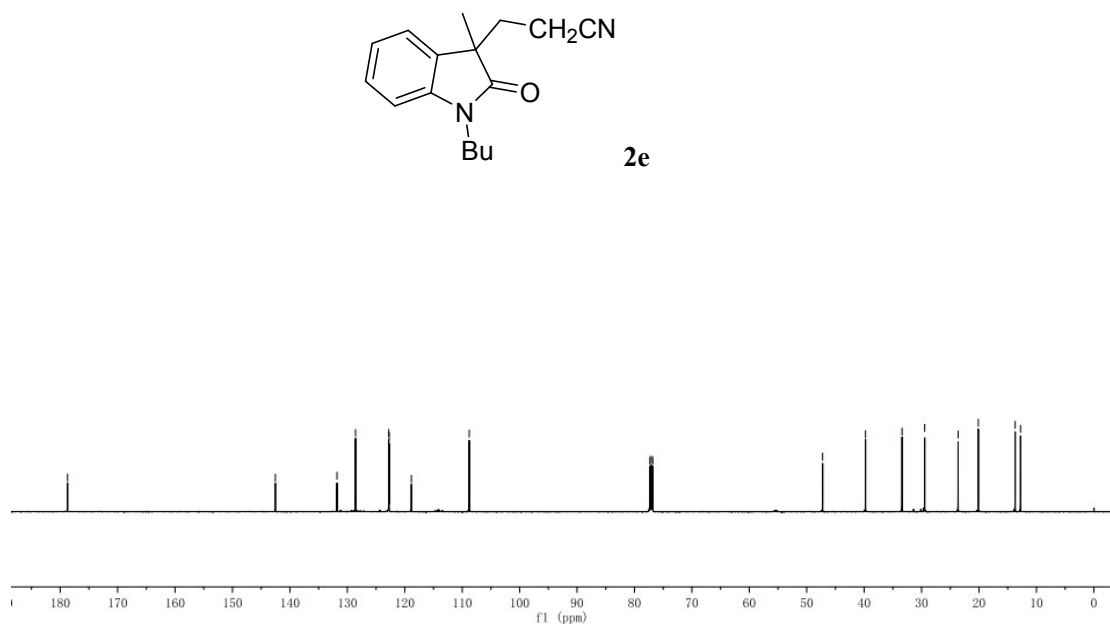

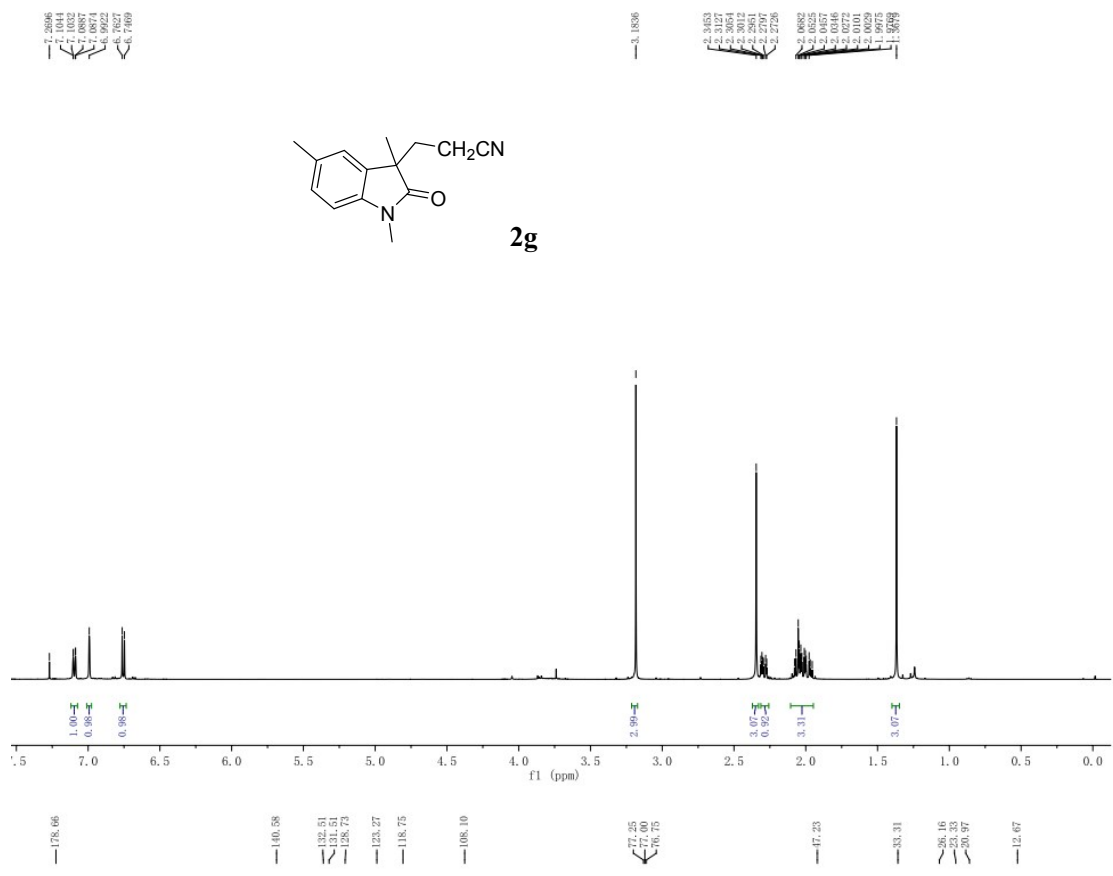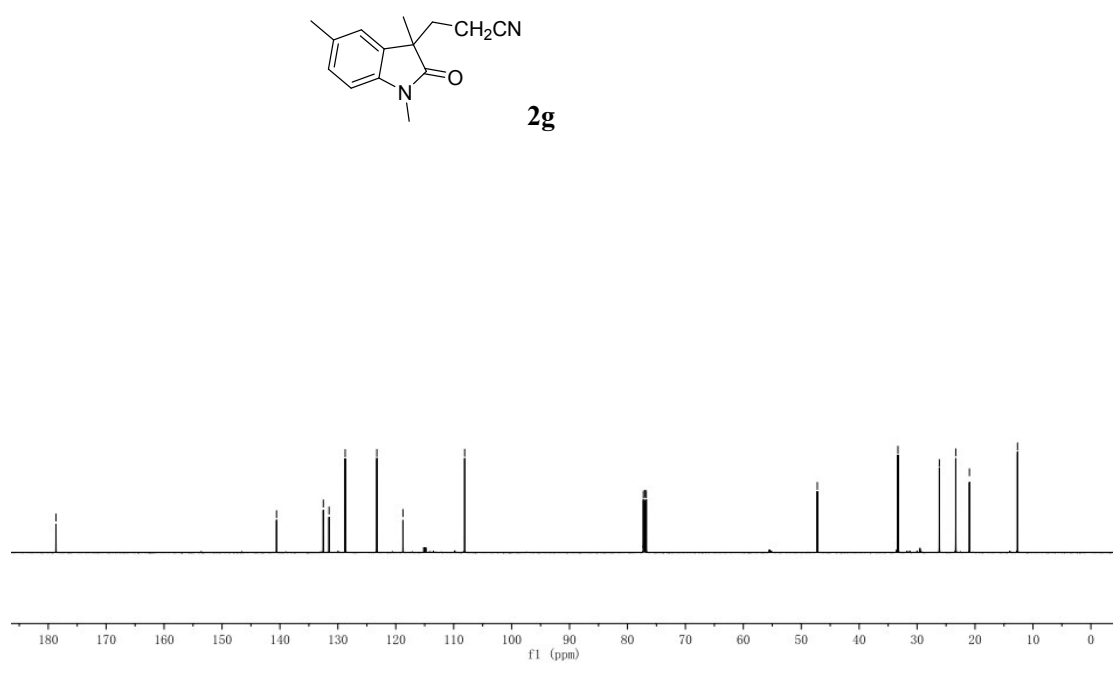

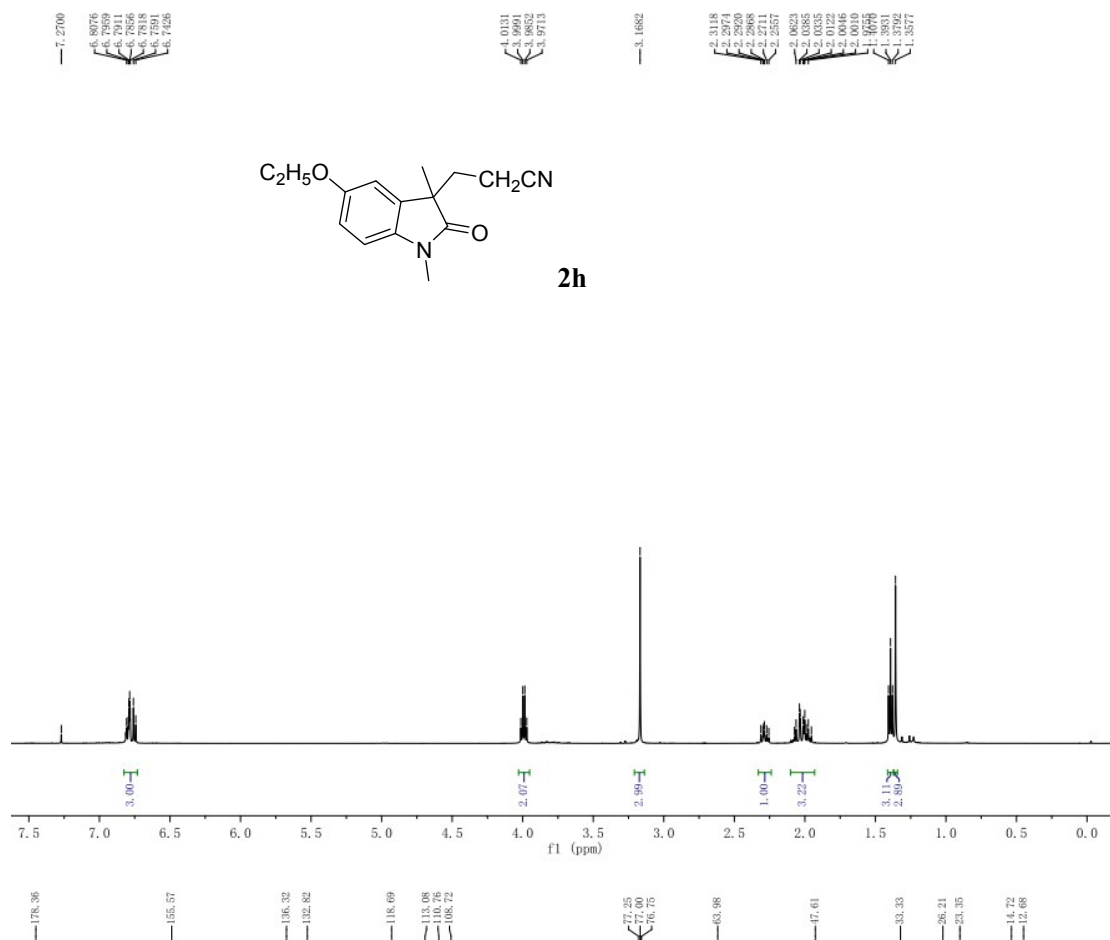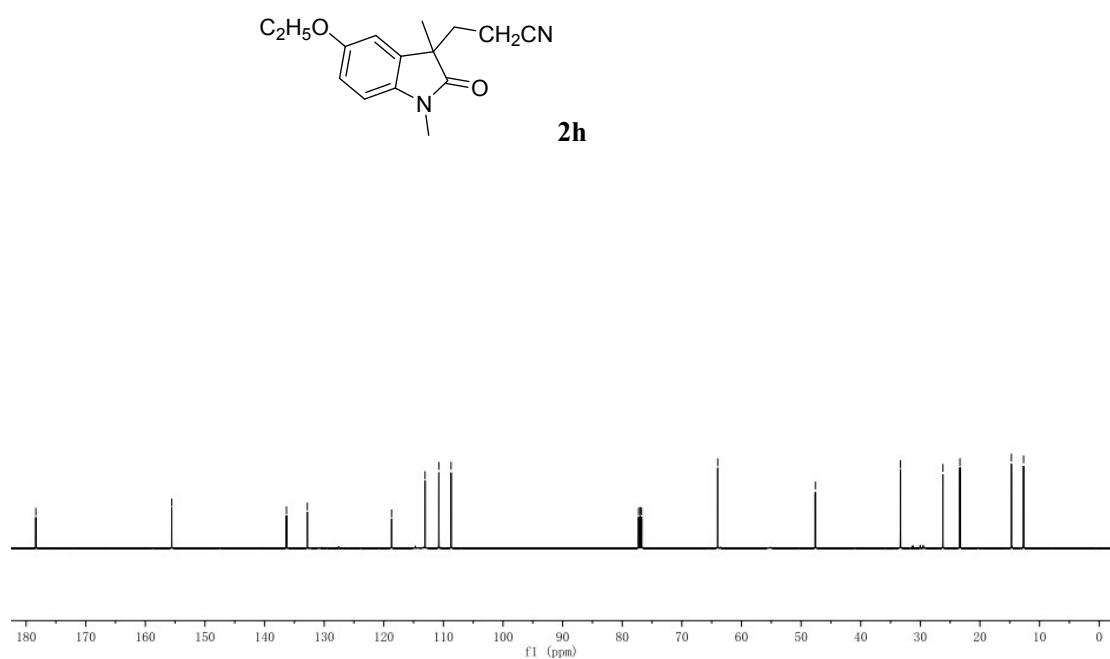

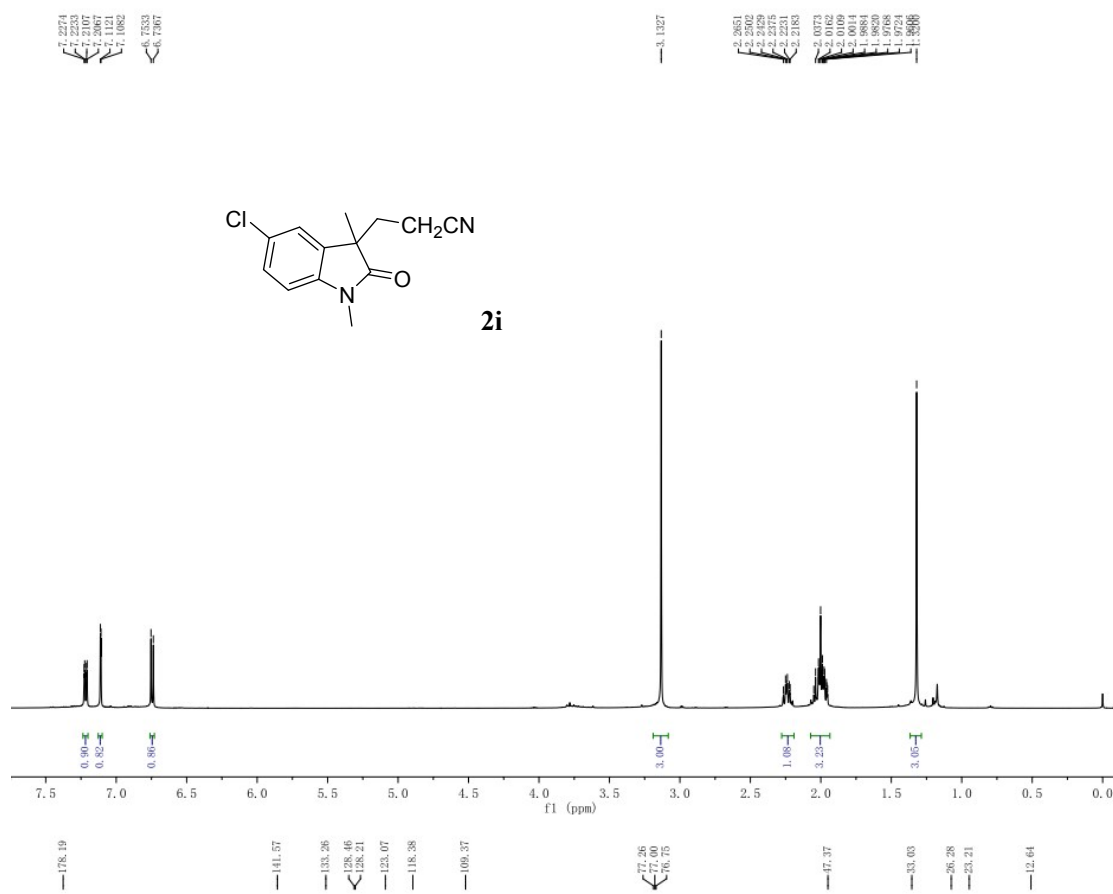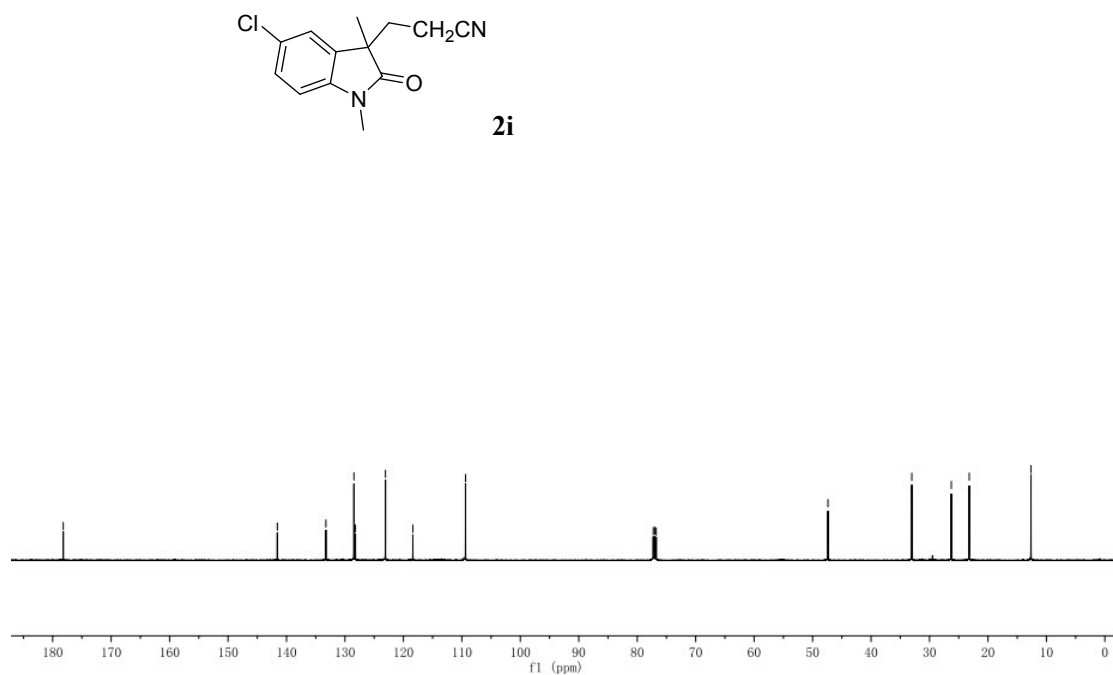



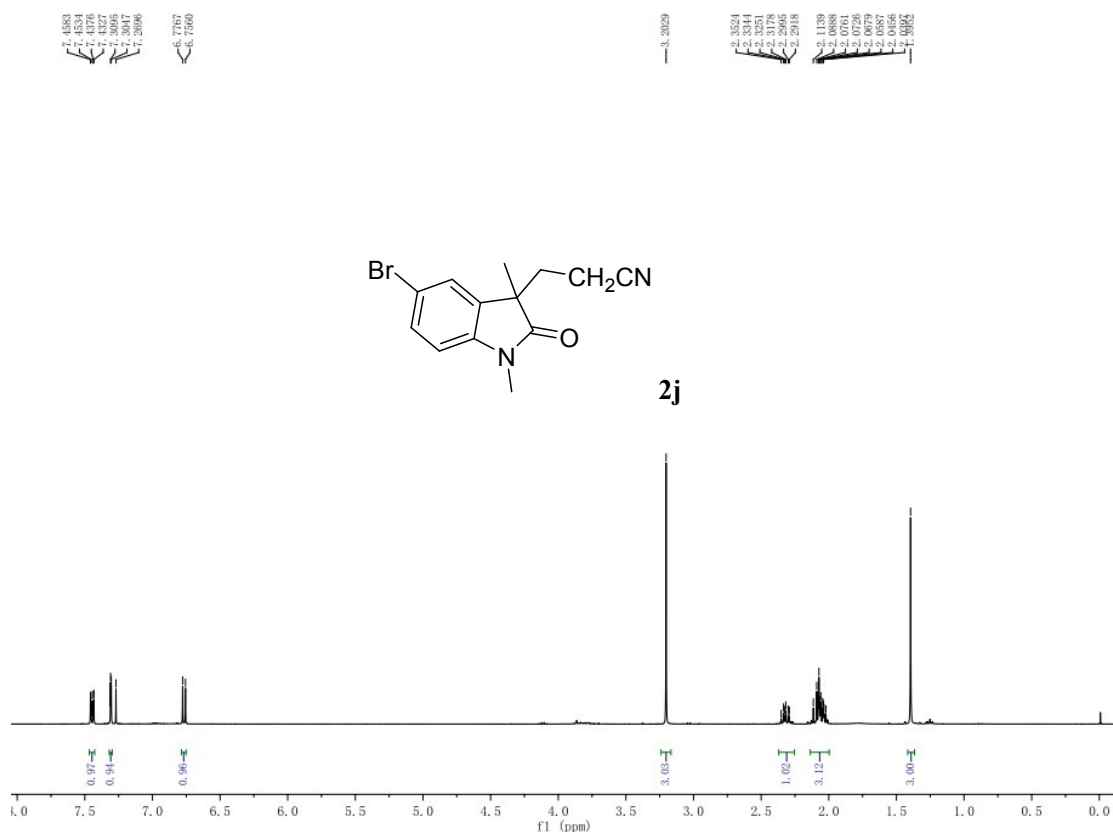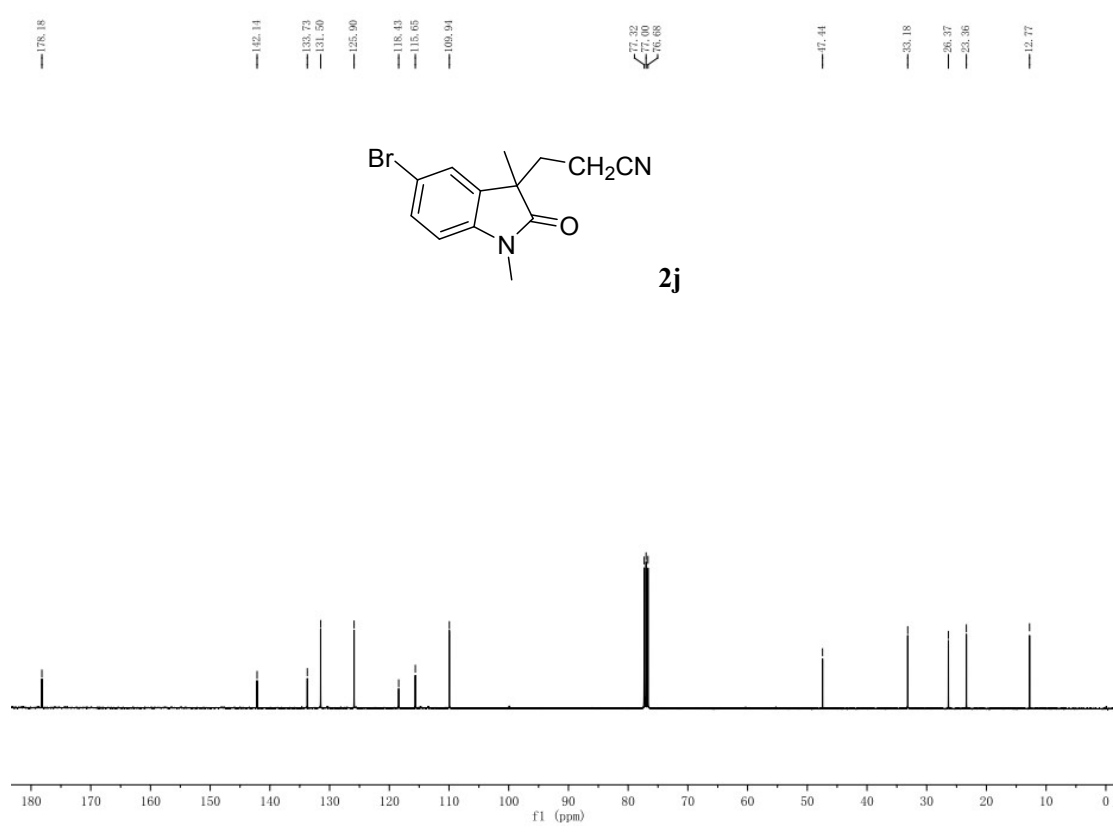

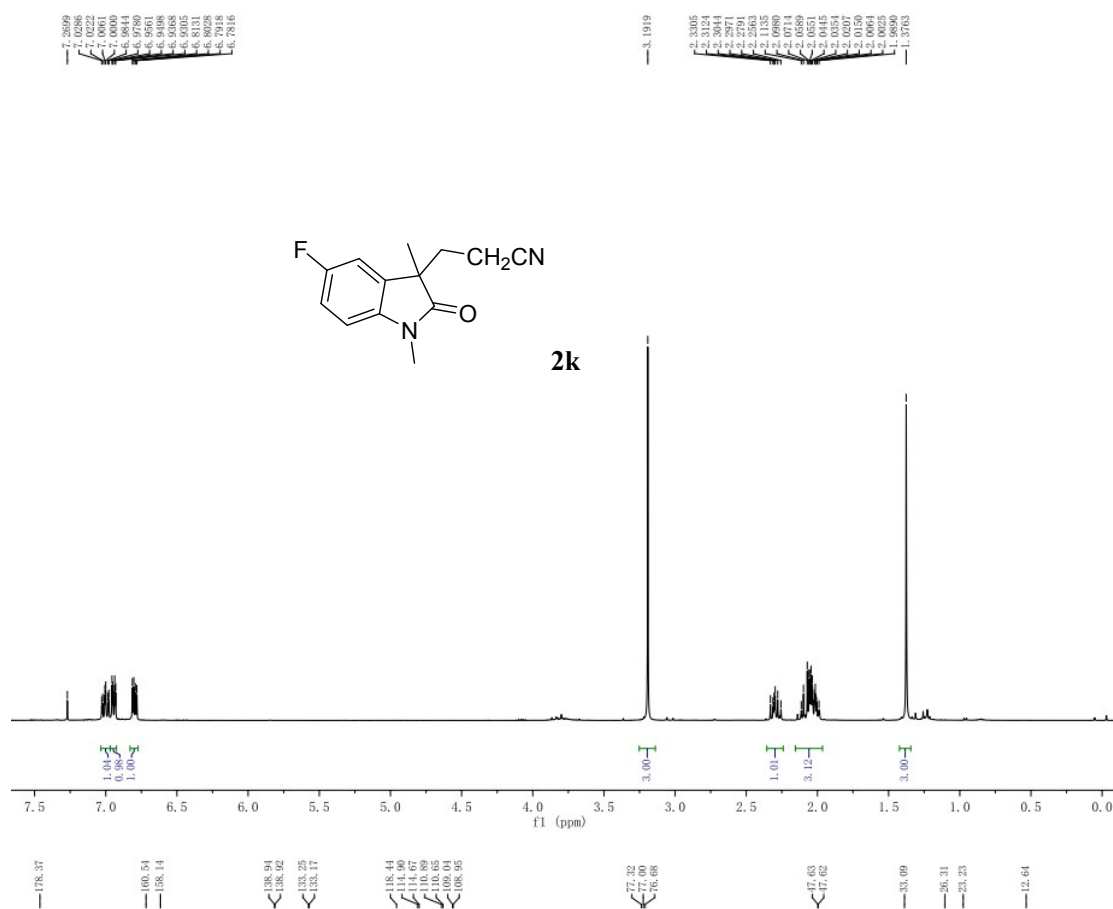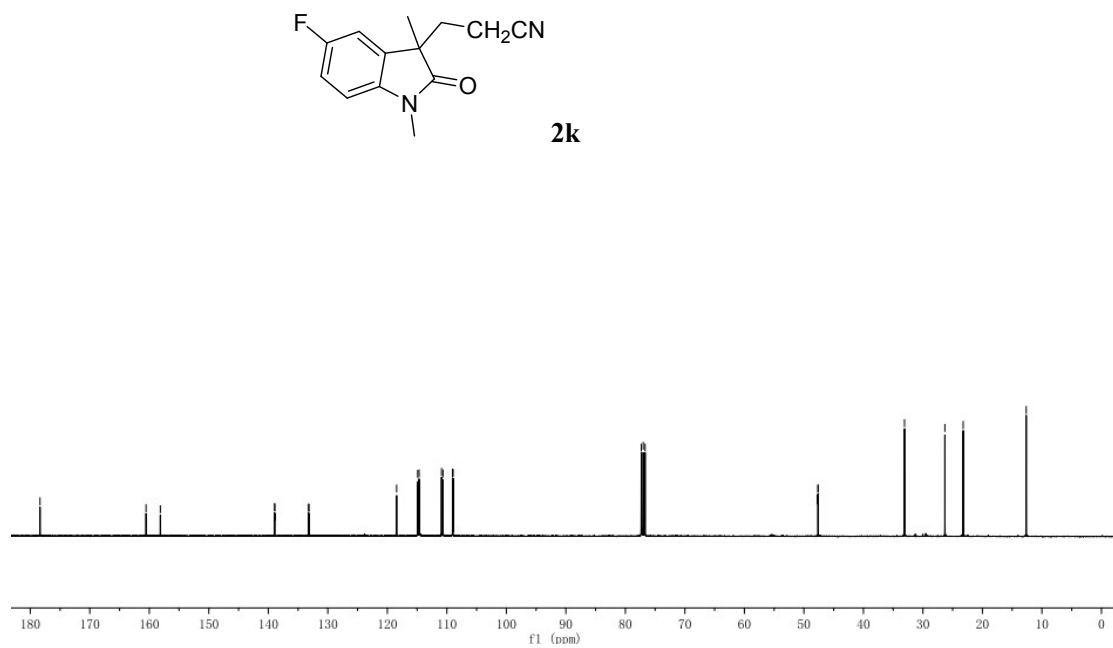

7.2098  
7.1916  
7.1849  
7.0231  
6.9837  
6.8569  
6.8413  
6.7101  
6.6942

3.1863  
3.1787  
2.3709  
2.3581  
2.2938  
2.2766  
2.2573  
2.2485  
2.2387  
2.2295  
2.0384  
2.0322  
2.0199  
1.9835  
1.9669  
1.9535  
1.9476  
1.4881  
1.3500

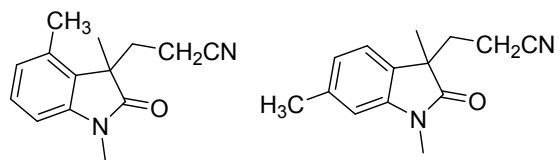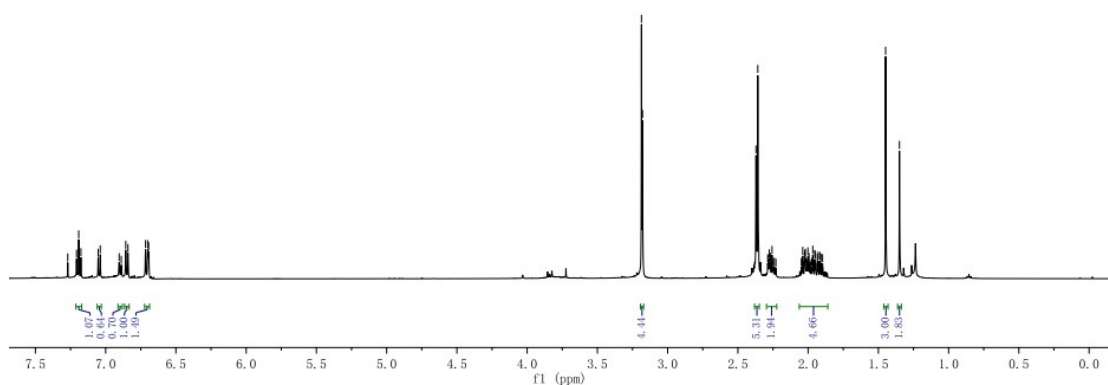

178.99  
178.67  
143.25  
142.98  
138.63  
134.16  
128.41  
128.32  
127.86  
125.29  
122.14  
118.40  
109.26  
106.10  
77.26  
77.00  
76.75  
48.13  
46.91  
33.20  
31.22  
26.18  
25.44  
23.32  
21.61  
17.95  
17.85  
12.82  
12.59

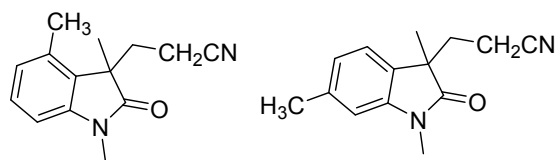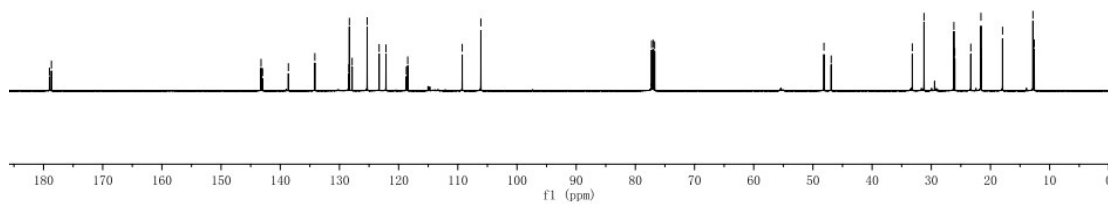

7.5987  
7.5750  
7.5591  
7.5306  
7.5089  
7.4808  
7.4941  
7.4810  
7.4770  
7.4006  
6.8807  
6.8155  
6.8008

3.2273  
3.2076  
2.5983  
2.5449  
2.5376  
2.5327  
2.5167  
2.5040  
2.4853  
2.3832  
2.3792  
2.3675  
2.0007  
2.0282  
2.0259  
2.0115  
2.0115  
1.9904  
1.3899

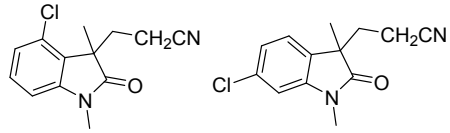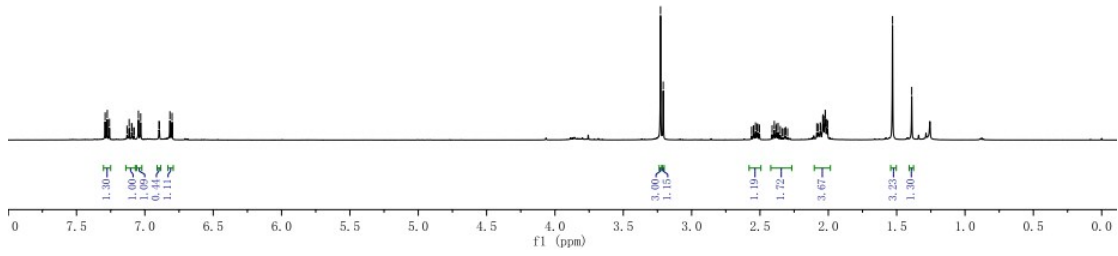

178.06  
178.20

144.92  
144.22

134.32  
129.85  
129.88  
129.86  
127.71  
123.48  
122.68

109.18  
106.97

27.25  
26.94

48.87  
46.94

33.04  
30.18  
26.46  
23.30  
21.12

13.02  
12.65

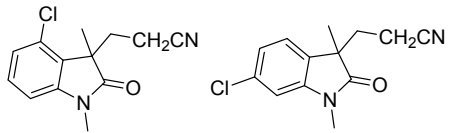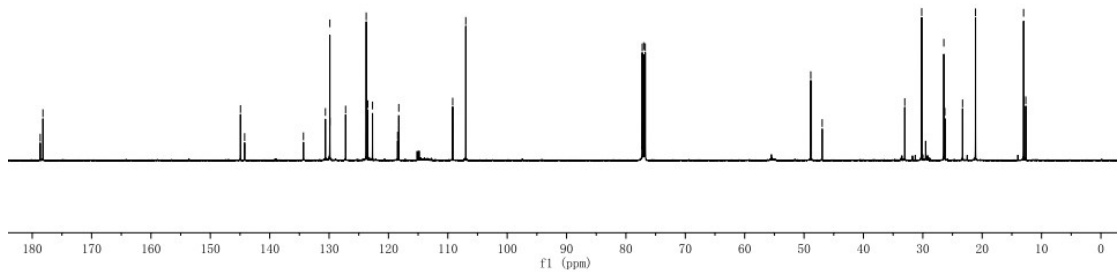

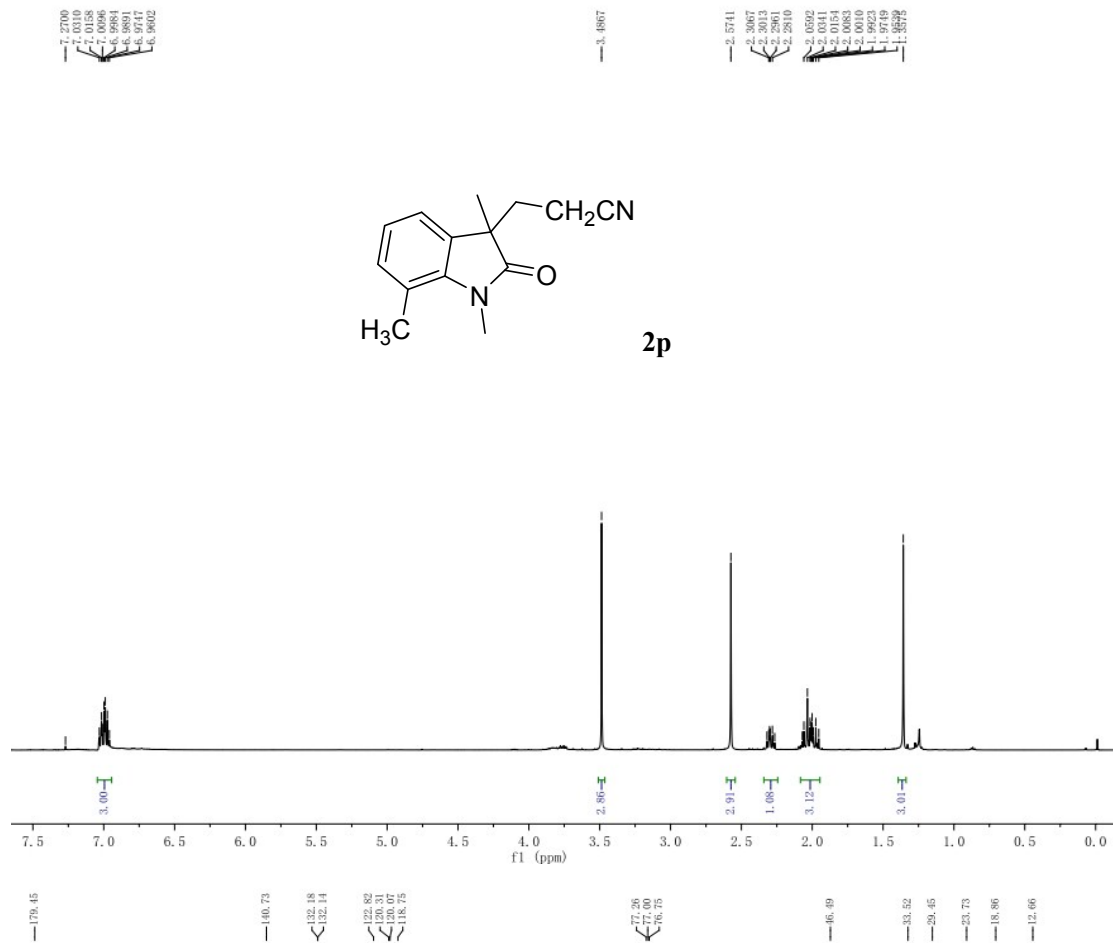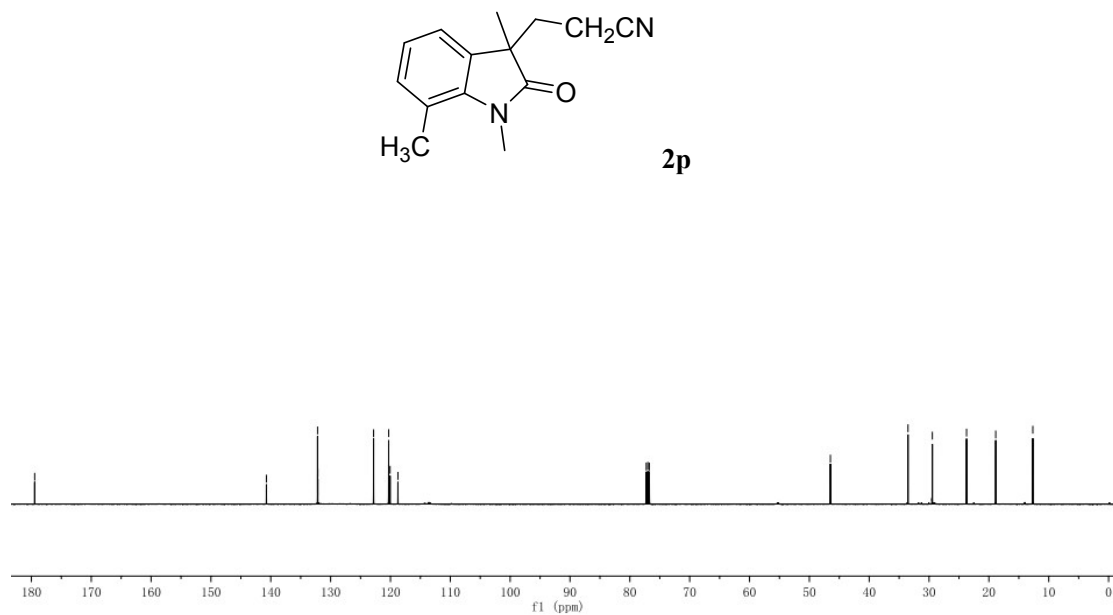



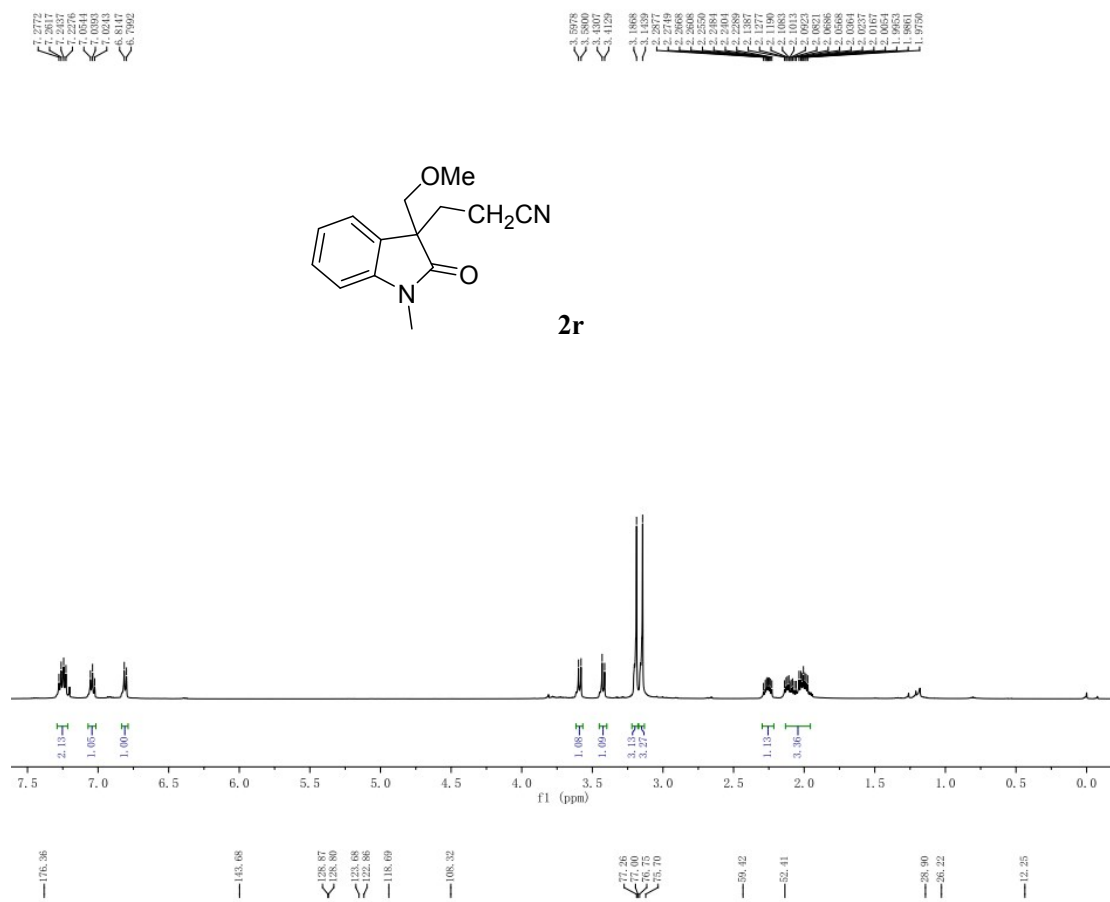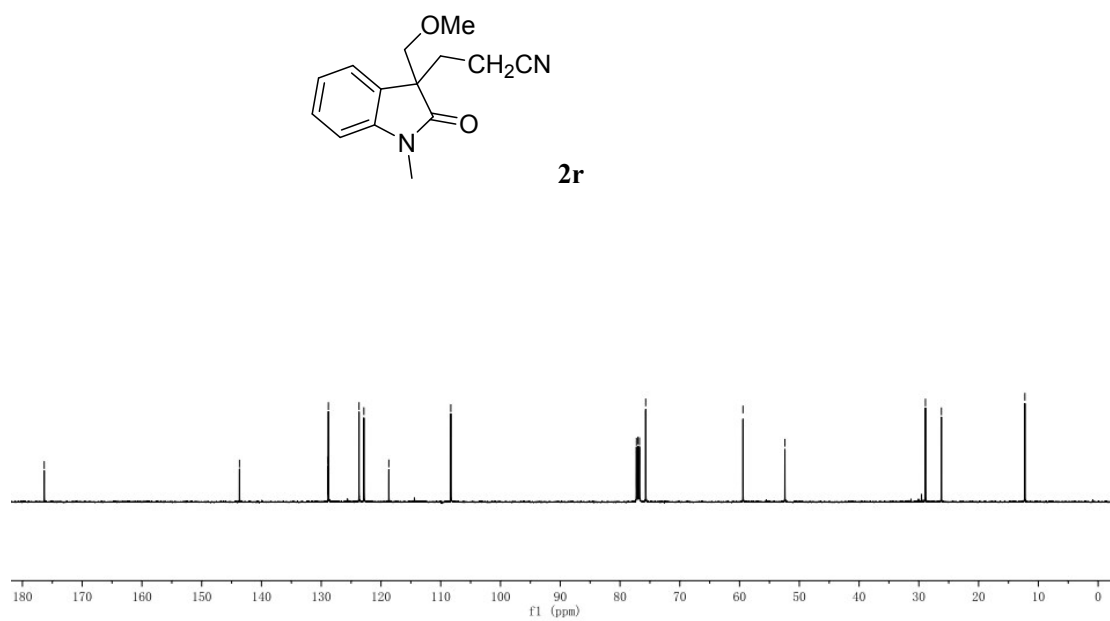

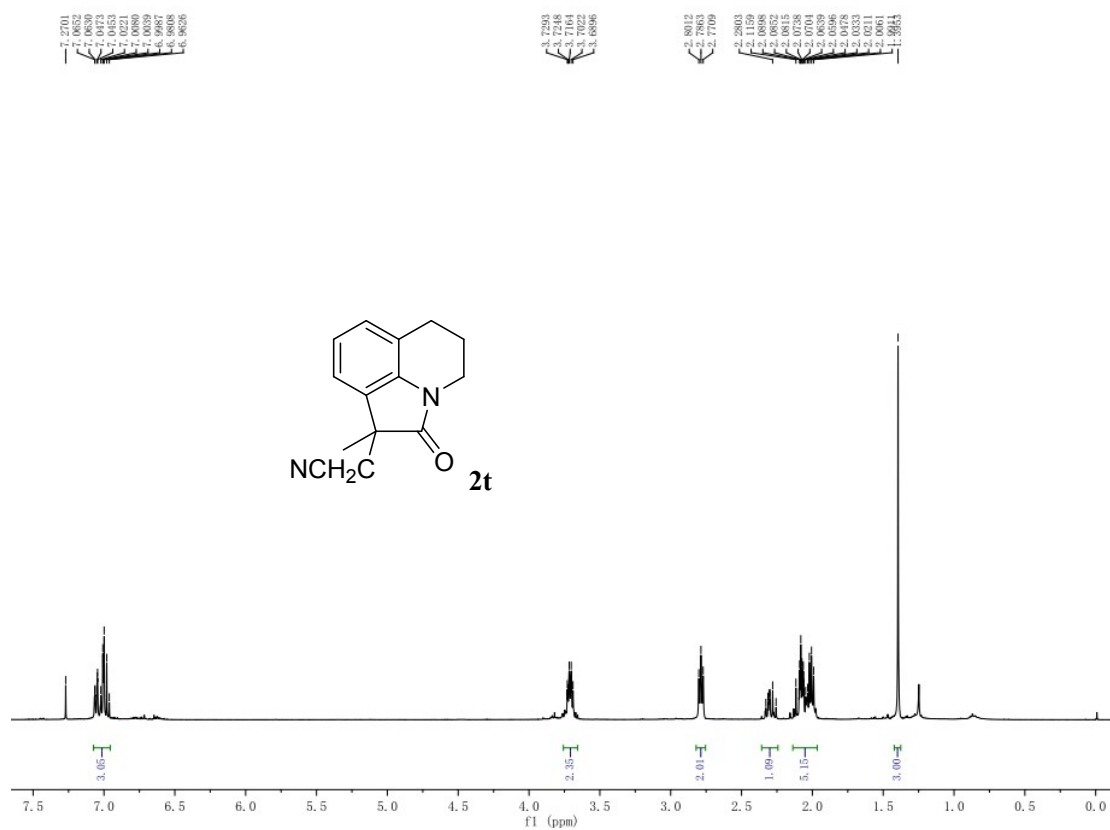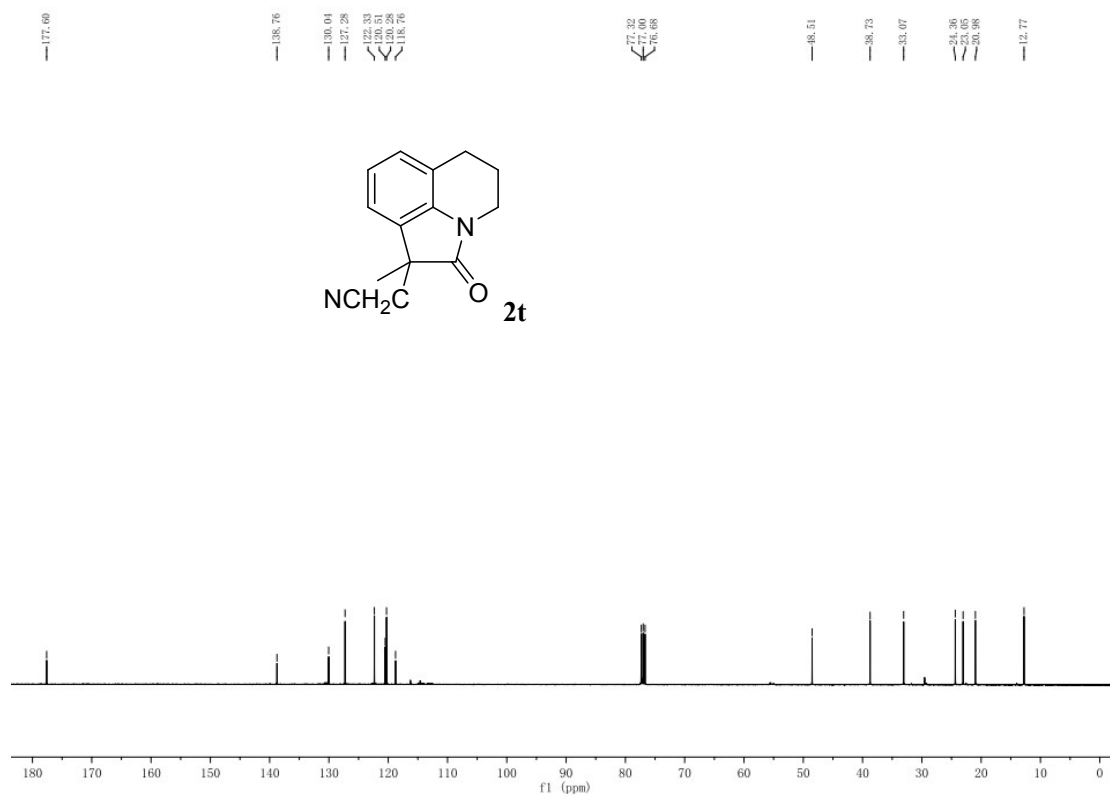



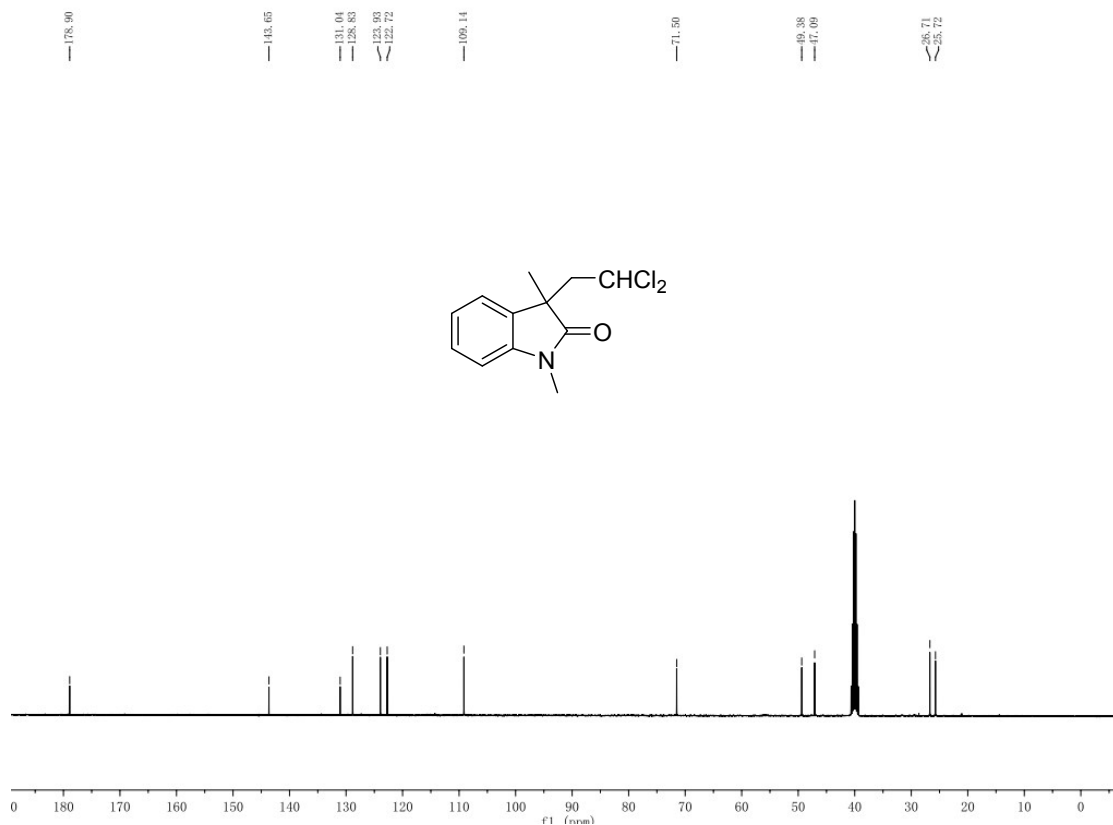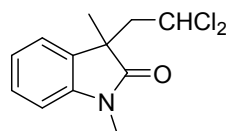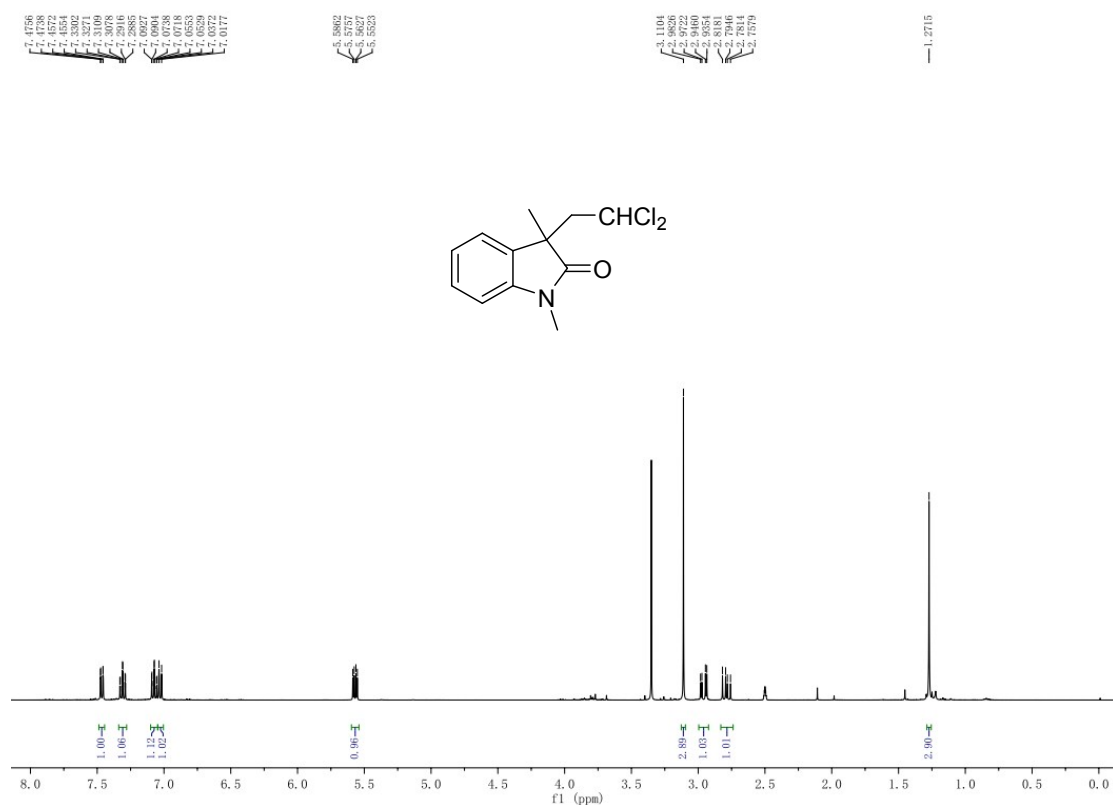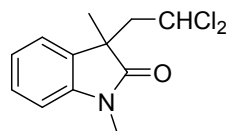

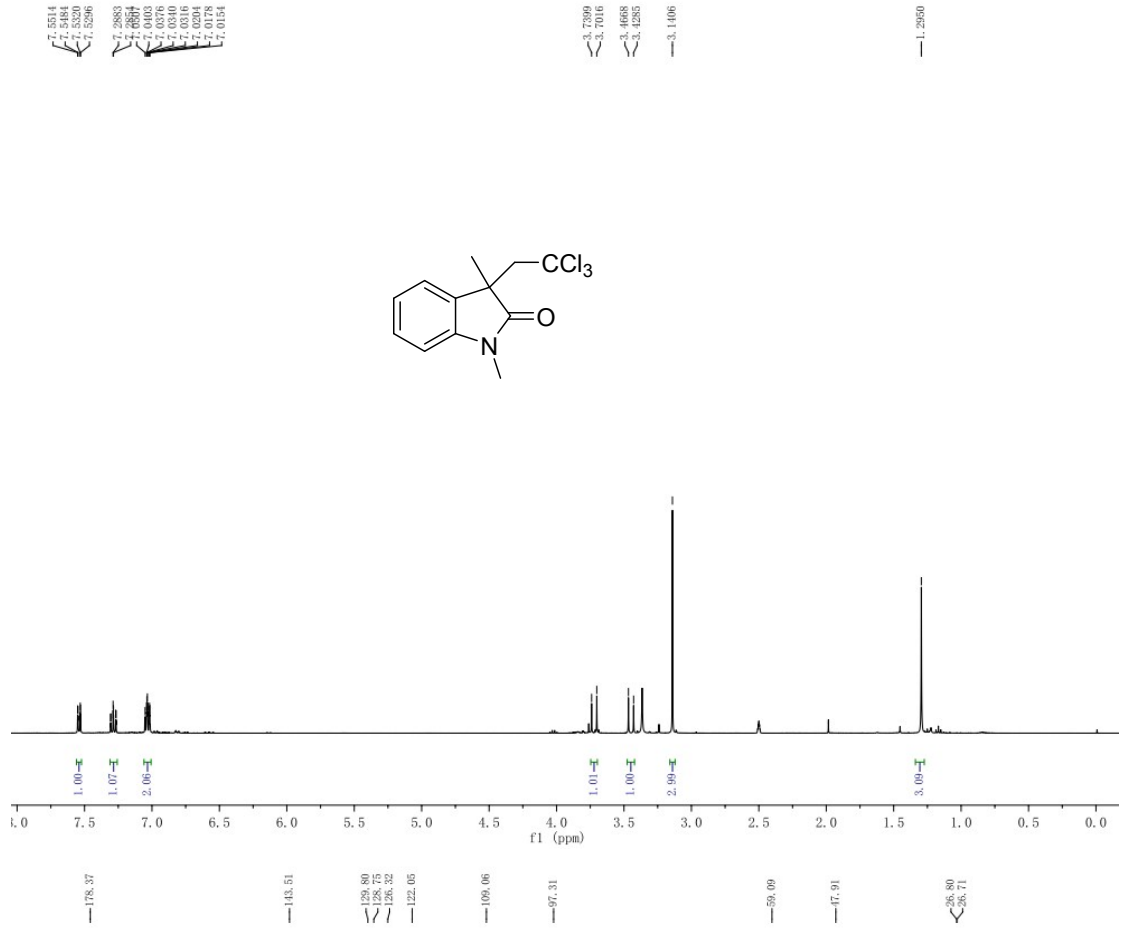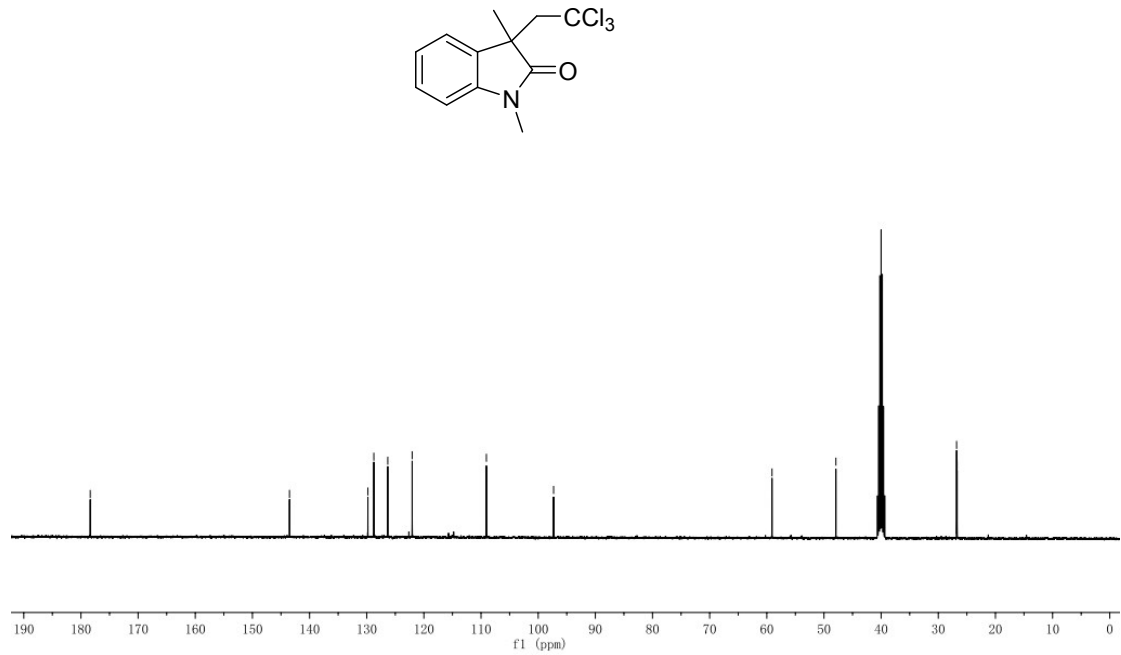

Supplement: c5ra23471a1.pdf [file c5ra23471a1.pdf]
